1  
2  
3  
4  
5  
6  
7  
8  
9  
10  
11  
12  
13  
14  
15  
16  
17  
18  
19  
20  
21  
22  
23  
24  
25  
26  
27  
28  
29  
30  
31

**Cannabinoid signaling promotes the reprogramming of Muller glia into proliferating progenitor cells.**

**Abbreviated title:** Cannabinoid signaling promotes Müller glia reprogramming

Warren A. Campbell<sup>1</sup>, Sydney Blum<sup>1</sup>, Alana Reske<sup>1</sup>, Thanh Hoang<sup>2</sup>, Seth Blackshaw<sup>2</sup>,  
Andy J. Fischer<sup>1\*</sup>

1 Department of Neuroscience, College of Medicine, The Ohio State University,  
Columbus, OH

2 Solomon H. Snyder Department of Neuroscience, Johns Hopkins University School of  
Medicine, Baltimore, MD

**\*corresponding author:** Andy J. Fischer, Department of Neuroscience, Ohio State  
University, College of Medicine, 3020 Graves Hall, 333 W. 10<sup>th</sup> Ave, Columbus, OH  
43210-1239, USA. Telephone: (614) 292-3524; Fax: (614) 688-8742; email:  
[Andrew.Fischer@osumc.edu](mailto:Andrew.Fischer@osumc.edu)

**Author Contributions:** WAC and executed experiments, gathered data, constructed  
figures, and contributed to writing the manuscript. SB and AR executed experiments,  
and gathered data. AJF designed experiments, analyzed data, constructed figures, and  
wrote the manuscript.

**Acknowledgements:** This work was supported by RO1 EY022030-08, RO1 EY032141-  
01 (AJF) and UO1 EY027267-04 (AJF).

**Word count: 9697**

32

33

34 **Abstract**

35           Endocannabinoids (eCB) are lipid-based neurotransmitters that are known to  
36 influence synaptic function in the visual system. eCBs are also known to suppress  
37 neuroinflammation in different pathological states. However, nothing is known about the  
38 roles of the eCB system during reprogramming of Müller glia (MG) into proliferating  
39 progenitor-like cells in the retina. Accordingly, we used the chick and mouse model to  
40 characterize expression patterns of eCB-related genes and applied pharmacological  
41 agents to examine how the eCB system impacts glial reactivity and the capacity of MG  
42 to become Müller glia-derived progenitor cells (MGPCs). We probed single cell RNA-  
43 seq libraries to identify eCB-related genes and identify cells with dynamic patterns of  
44 expression in damaged retinas. MG and inner retinal neurons expressed the eCB  
45 receptor *CNR1*, as well as enzymes involved in eCB metabolism. In the chick,  
46 intraocular injections of 2-Arachidonoylglycerol (2-AG) and Anandamide (AEA)  
47 potentiated the formation of MGPCs. Consistent with these findings, *CNR1*-agonists  
48 and *MGLL*-inhibitor promoted reprogramming, whereas *CNR1*-antagonist and inhibitors  
49 of eCB synthesis suppressed reprogramming. Surprisingly, retinal microglia were  
50 largely unaffected by increases or decreases in eCB signaling in both chick and mouse  
51 models. However, eCB-signaling suppressed the activation of *NFκB*-reporter in MG in  
52 damaged mouse retinas. We conclude that the eCB system in the retina influences the  
53 reactivity of MG and is important for regulating glial reactivity and the reprogramming of

54 MG into proliferating MGPCs, but not for regulating the reactivity of immune cells in the  
55 retina.

56 **Keywords:** Endocannabinoids, Müller glia, Müller glia derived progenitor cells,  
57 scRNA-seq, Müller glia reprogramming

58

## 59 **Main Points**

60 Müller glia express CNR1 receptor and endocannabinoid synthesis genes.

61 Endocannabinoids after retinal damage promote the formation of Müller glia derived  
62 progenitor cells in chick.

63 Endocannabinoids reduce NFkB activity in mouse Müller glia.

64

## 65 **Introduction**

66 The endocannabinoid (eCB) system has been well-studied in the visual system  
67 and is known to modulate physiologic functions in different ocular tissues, including the

68 retina (reviewed by (Schwitzer et al., 2016). The eCB system consists of cannabinoid  
69 receptors 1 and 2 (*CNR1*, *CNR2*), endogenous ligands 2-Arachidonoylglycerol (2-AG)

70 and Arachidonylethanolamide (AEA), and the enzymes that control ligand synthesis

71 and degradation. The eCB pathway has been identified in the retinas of different

72 vertebrates including embryonic chick (da Silva Sampaio et al., 2018), goldfish (Yazulla

73 et al., 2000), rat (Yang et al., 2016), bovine (Bisogno et al., 1999), porcine (Matsuda et

74 al., 1997), mouse (Hu et al., 2010), and human (Straiker et al., 1999). The expression of

75 *CNR1* and *CNR2* receptors in the central nervous system varies across species but

76 typically includes distinct types of neurons, astrocytes, microglia, and Müller glia.

77 Activation of eCB receptors is known to modulate neurotransmission (Diana and

78 Bregestovski, 2005), synaptic plasticity (Xu and Chen, 2015), neuroinflammation  
79 (Centonze et al., 2007), and neuroprotection (Slusar et al., 2013).

80 Müller glia (MG) are thought to play a role in regulating eCBs in the retina. Both  
81 CNR1 and CNR2 receptors have been identified in goldfish MG (Yazulla et al., 2000),  
82 and CNR2 receptors have been identified in the retinas of vervet monkeys (Bouskila et  
83 al., 2013). eCBs have been shown to modify activity or suppress T-type voltage gated  
84 calcium channels in rat MG (Yang et al., 2016) and modulate the inflammatory micro-  
85 environment (Silverman and Wong, 2018). MG possess pathogen- and damage-  
86 associated molecular pattern (PAMP/DAMP) receptors to respond to pathological  
87 conditions (Kumar and Shamsuddin, 2012; Kumar et al., 2013; Shamsuddin and Kumar,  
88 2011). Activation leads to the secretion of pro-inflammatory cytokines to facilitate the  
89 migration and activation of macrophages and microglia (Inoue et al., 1996). At the same  
90 time, retinal microglia become reactive and coordinate inflammation with MG, which  
91 results in NF- $\kappa$ B activation, concomitant reactive gliosis, and formation of MGPCs  
92 (Palazzo et al., 2019). However, MG also produce anti-inflammatory signals such as  
93 TGFB2 (Palazzo et al., 2020) and TIMP3 (Campbell et al., 2019) to suppress  
94 inflammation. eCBs are believed to have anti-inflammatory actions within the central  
95 nervous system (Nagarkatti et al., 2009). Little is known about how eCBs influence  
96 inflammation in the retina and whether eCBs impact the ability of MG to reprogram into  
97 MG-derived progenitor cells (MGPCs).

98 The impact of inflammatory signals on MG is context specific, dependent on the  
99 combination of cytokines and the model of damage. In zebrafish, TNFa (Iribarne et al.,  
100 2019) and IL-6 (Zhao et al., 2014) are necessary for MG to transition to a reactive state

101 into a proliferating progenitor-like cells. In the chick, by comparison, TNF alone does not  
102 induce MGPCs and activation of the NF- $\kappa$ B pathway inhibits the formation of MGPCs  
103 (Hoang et al., 2020; Palazzo et al., 2020). When microglia are ablated, MGPCs fail to  
104 form (Fischer et al., 2014), and the effects of NF- $\kappa$ B-inhibition are reversed to promote  
105 the formation of MGPCs (Palazzo et al., 2020). In damaged mouse retinas, reactive  
106 MG rapidly transition into a gliotic state and are forced back into a resting state, in part,  
107 by regulatory networks involving NF- $\kappa$ B-related factors (Hoang et al., 2020). This  
108 suggests that there is an important balance of inflammatory cytokines and timing of  
109 signals to drive the reprogramming of MG to dedifferentiate and proliferate as MGPCs.  
110 It is currently thought that rapid induction of microglial reactivity is required to “kick-start”  
111 MG reactivity as an initial step of reprogramming (Fischer et al., 2014; White et al.,  
112 2017), whereas sustained elevated microglial reactivity suppresses the neuronal  
113 differentiation of progeny produced by MGPCs (Palazzo et al., 2020; Todd et al., 2020).

114 In this study we investigate how eCBs influence glial reactivity, inflammation, and  
115 reprogramming of MG in the chick retina. Using scRNA-seq, we analyze the expression  
116 pattern of genes in the eCB system and changes in these genes following retinal  
117 damage. We apply pharmacological agents to activate or inhibit eCB-signaling and  
118 assess changes in glial activation and reprogramming of MG into proliferating MGPCs.

119

## 120 **Methods and Materials:**

### 121 *Animals:*

122 The animals approved in these experiments followed guidelines established by  
123 the National Institutes of Health and IACUC at The Ohio State University. P0 wildtype

124 leghorn chicks (*Gallus gallus domesticus*) were obtained from Meyer Hatchery (Polk,  
125 Ohio). Post-hatch chicks were housed in stainless-steel brooders at 25°C with a diurnal  
126 cycle of 12 hours light, 12 hours dark (8:00 AM-8:00 PM) and provided water and  
127 Purina<sup>tm</sup> chick starter *ad libitum*.

128

### 129 *Intraocular injections:*

130 Chicks were anesthetized with 2.5% isoflurane mixed with oxygen from a non-  
131 rebreathing vaporizer. The intraocular injections were performed as previously  
132 described (Fischer et al., 1998). With all injection paradigms, both pharmacological and  
133 vehicle treatments were administered to the right and left eye respectively. Compounds  
134 were injected in 20 µl sterile saline with 0.05 mg/ml bovine serum albumin added as a  
135 carrier. Compounds included: NMDA (500nmol dose high dose, 60nmol low dose;  
136 Sigma-Aldrich), JJKK048 (0.25mg/dose Sigma-Aldrich), ARN19874 (0.25mg/dose  
137 AOBIIOUS), rimonabant (0.25mg/dose Sigma-Aldrich), PF 04457845 (0.25mg/dose  
138 Sigma-Aldrich), Orlistat (0.25mg/dose Sigma-Aldrich), URB 597 (0.25mg/dose Sigma-  
139 Aldrich). 5-Ethynyl-2'-deoxyuridine (EdU) was intravitreally injected to label the nuclei of  
140 proliferating cells. Injection paradigms are included in each figure.

141

### 142 *Enzyme-linked Immunosorbent Assay*

143 Endocannabinoids were extracted from retinal tissue and screened for 2-AG  
144 levels using a direct competitive enzyme linked immunosorbent assay (MyBioSource).  
145 Three retinas were extracted from each treatment group and placed in 5:3  
146 homogenization solution (formic acid pH = 3): extraction solution (9:1

147 ethylacetate:hexane) on ice. The tissue was homogenized with high intensity sonication  
148 on ice, frozen at -20, and the nonaqueous fraction was removed for evaporation and  
149 rehydration in DMSO. The lipid extract was applied to the wells of ELISA and the  
150 protocol was followed per the manufacturer's instructions.

151

### 152 *Single Cell RNA sequencing of retinas*

153 Retinas were obtained from postnatal chick and adult mice. Isolated retinas were  
154 dissociated in a 0.25% papain solution in Hank's balanced salt solution (HBSS), pH =  
155 7.4, for 30 minutes, and suspensions were frequently triturated. The dissociated cells  
156 were passed through a sterile 70µm filter to remove large particulate debris. Dissociated  
157 cells were assessed for viability (Countess II; Invitrogen) and cell-density diluted to 700  
158 cell/µl. Each single cell cDNA library was prepared for a target of 10,000 cells per  
159 sample. The cell suspension and Chromium Single Cell 3' V3 reagents (10X Genomics)  
160 were loaded onto chips to capture individual cells with individual gel beads in emulsion  
161 (GEMs) using 10X Chromium Controller. cDNA and library amplification for an optimal  
162 signal was 12 and 10 cycles respectively. Samples were multiplexed for sequencing on  
163 Illumina's Novaseq6000 (Novogene). Sequencer files were converted from a BCL to a  
164 Fastq format, where the sequence files were de-multiplexed, aligned, and annotated  
165 using the chick ENSEMBL database (GRCg6a, Ensembl release 94) and Cell Ranger  
166 software (10x Genomics). Using Seurat toolkits, Uniform Manifold Approximation and  
167 Projection for Dimension Reduction (UMAP) plots were generated from aggregates of  
168 multiple scRNA-seq libraries (Butler et al., 2018; Satija et al., 2015). Compiled in each  
169 UMAP plot are two biological library replicates for each experimental condition. Seurat

170 was used to construct violin/scatter plots. Significance of difference in violin/scatter plots  
171 was determined using a Wilcoxon Rank Sum test with Bonferroni correction. Genes that  
172 were used to identify different types of retinal cells included the following: (1) Müller glia:  
173 *GLUL*, *VIM*, *SCL1A3*, *RLBP1*, (2) MGPCs: *PCNA*, *CDK1*, *TOP2A*, *ASCL1*, (3) microglia:  
174 *C1QA*, *C1QB*, *CCL4*, *CSF1R*, *TMEM22*, (4) ganglion cells: *THY1*, *POU4F2*, *RBPM2*,  
175 *NEFL*, *NEFM*, (5) amacrine cells: *GAD67*, *CALB2*, *TFAP2A*, (6) horizontal cells:  
176 *PROX1*, *CALB2*, *NTRK1*, (7) bipolar cells: *VSX1*, *OTX2*, *GRIK1*, *GABRA1*, and (7) cone  
177 photoreceptors: *CALB1*, *GNAT2*, *OPN1LW*, and (8) rod photoreceptors: *RHO*, *NR2E3*,  
178 *ARR3*. scRNA-seq libraries can be queried at:  
179 <https://proteinpaint.stjude.org/F/2019.retina.scRNA.html>

180

#### 181 *Fixation, sectioning, and immunocytochemistry:*

182 Ocular tissues were fixed, sectioned, and labeled via immunohistochemistry as  
183 described previously (Fischer et al., 2008, 2009a). Dilutions and commercial sources of  
184 antibodies used in this study are listed in table 2. Labeling was not due to non-specific  
185 labeling of secondary antibodies or tissue autofluorescence because sections incubated  
186 with secondary antibodies alone were devoid of fluorescence. Secondary antibodies  
187 included donkey-anti-goat-Alexa488/568, goat-anti-rabbit-Alexa488/568/647, goat-anti-  
188 mouse-Alexa488/568/647, goat-anti-rat-Alexa488 (Life Technologies) diluted to 1:1000  
189 in PBS and 0.2% Triton X-100.

190

#### 191 *Labeling for EdU:*

192 For the detection of nuclei that incorporated EdU, immunolabeled sections were  
193 fixed in 4% formaldehyde in 0.1M PBS pH 7.4 for 5 minutes at room temperature.



194 Samples were washed for 5 minutes with PBS, permeabilized with 0.5% Triton X-100 in  
195 PBS for 1 minute at room temperature and washed twice for 5 minutes in PBS. Sections  
196 were incubated for 30 minutes at room temperature in a buffer consisting of 100 mM  
197 Tris, 8 mM CuSO<sub>4</sub>, and 100 mM ascorbic acid in dH<sub>2</sub>O. The Alexa Fluor 568 Azide  
198 (Thermo Fisher Scientific) was added to the buffer at a 1:100 dilution.

199

200 *Terminal deoxynucleotidyl transferase dUTP nick end labeling (TUNEL):*

201 The TUNEL assay was implemented to identify dying cells by imaging  
202 fluorescent labeling of double stranded DNA breaks in nuclei. The *In Situ* Cell Death Kit  
203 (TMR red; Roche Applied Science) was applied to fixed retinal sections as per the  
204 manufacturer's instructions.

205

206 *Photography, measurements, cell counts and statistics:*

207 Microscopy images of retinal sections were captured with the Leica DM5000B  
208 microscope with epifluorescence and the Leica DC500 digital camera. High resolution  
209 confocal images were obtained with a Leica SP8 available in The Department of  
210 Neuroscience Imaging Facility at The Ohio State University. Representative images are  
211 modified to have enhanced color, brightness, and contrast for improved clarity using  
212 Adobe Photoshop. In EdU proliferation assays, a fixed region of retina was counted and  
213 average numbers of Sox2 and EdU co-labeled cells. The retinal region selected for  
214 investigation was standardized between treatment and control groups to reduce  
215 variability and improve reproducibility.

216 Similar to previous reports (Fischer et al., 2009b, 2009c; Ghai et al., 2009),  
217 immunofluorescence was quantified by using Image J (NIH). Identical illumination,  
218 microscope, and camera settings were used to obtain images for quantification. Retinal  
219 areas were sampled from 5.4 MP digital images. These areas were randomly sampled  
220 over the inner nuclear layer (INL) where the nuclei of the bipolar and amacrine neurons  
221 were observed. Measurements of immunofluorescence were performed using ImagePro  
222 6.2 as described previously (Ghai et al., 2009; Stanke et al., 2010; Todd and Fischer,  
223 2015). The density sum was calculated as the total of pixel values for all pixels within  
224 thresholded regions. The mean density sum was calculated for the pixels within  
225 threshold regions from  $\geq 5$  retinas for each experimental condition. GraphPad Prism 6  
226 was used for statistical analyses.

227 Measurements of immunofluorescence of CD45 in microglia were made from  
228 single optical confocal sections by selecting the total area of pixel values above  
229 threshold ( $\geq 70$ ) for CD45 immunofluorescence. Measurements were made for regions  
230 containing pixels with intensity values of 70 or greater (0 = black and  
231 255 = saturated). The total area was calculated for regions with pixel intensities above  
232 threshold. The intensity sum was calculated as the total of pixel values for all pixels  
233 within threshold regions. The mean intensity sum was calculated for the pixels within  
234 threshold regions from  $\geq 5$  retinas for each experimental condition. For characterization  
235 of the morphology of the individual microglia, a Sholl analysis was used to characterize  
236 the size, sphericity, and projections (ImageJ).

237 For statistical evaluation of differences across treatments, a two-tailed paired *t*-  
238 test was applied for intra-individual variability where each biological sample also served

239 as its own control. For two treatment groups comparing inter-individual variability, a two-  
240 tailed unpaired *t*-test was applied. For multivariate analysis, an ANOVA with the  
241 associated Tukey Test was used to evaluate any significant differences between  
242 multiple groups.

243

244

245

246

## 247 **Results:**

### 248 **Patterns of expression of eCB-related genes**

249 scRNA-seq libraries were aggregated from control retinas and retinas treated  
250 with NMDA-damage at different times (3, 12 and 48 hrs) after treatment. These libraries  
251 were clustered and analyzed for expression eCB-related genes under MG-  
252 reprogramming conditions (Fig. 1). UMAP plots were generated and the identity of  
253 clusters of cells established based on expression of cell-distinguishing markers (Fig.  
254 1b,c). Resting MG occupied a discrete cluster of cells and expressed high levels of  
255 *GLUL*, *VIM* (Fig. 1d), *RLBP1* and *CA2* (supplemental Fig. 1a-e,i). After damage, MG  
256 down-regulate these genes during transition to a reactive phenotype and up-regulate  
257 markers associated reactivity such as *MDK*, *HBEGF*, *MANF* (Fig. 1e, supplemental Fig.  
258 1e,f,i), with some genes such as *TGFB2*, *ATF3* and *TNFRSF1A* upregulated with 3hrs  
259 of NMDA-treatment (supplemental Fig. 1f,g,i). Upregulation of progenitor- and  
260 proliferation-related genes was observed in MGPCs at 48hrs after NMDA-treatment

261 (supplemental Fig. 1c,h,i), consistent with prior reports (Hoang et al., 2020; Campbell et  
262 al., 2021,).

263 The expression of eCB-related genes in MG has been previously reported in  
264 developing chick retina (da Silva Sampaio et al., 2018). The eCB system includes  
265 receptors *CNR1* and *CNR2* and enzymes involved in the synthesis (*NAPEPLD*, *DAGLA*  
266 and *DAGLB*) and degradation (*FAAH* and *MGLL*) of 2-AG and AEA (Fig. 1a). We  
267 detected *CNR1*, *MGLL*, *DAGLA*, *DAGLB*, *NAPELPD* and *FAAH* in control retinas and at  
268 different times after NMDA-treatment (Fig. 1f-i). *CNR2* was not detected. *MGLL* was  
269 prevalent and highly expressed by resting MG, but down-regulated in activated MG (Fig.  
270 1g,f). By comparison, levels of expression and prevalence of *CNR1* was high in many  
271 amacrine cells, and in a few ganglion and bipolar cells (Fig. 1f). *MGLL* and *NAPEPLD*  
272 were detected at high levels in many microglia, NIRG cells and bipolar cells, and in  
273 relatively few photoreceptors, ganglion and horizontal cells (Fig. 1e). *DAGLA* and *FAAH*  
274 had scattered expression across many retinal cell types, whereas *DAGLB* was  
275 prominently expressed at high levels in photoreceptors and inner retinal neurons (Fig.  
276 1h). *CNR1* and eCB-related genes, except *FAAH*, were uniformly down-regulated in  
277 levels, but increased in prevalence in activated MG after NMDA-treatment (Fig. 1g-i).

278 To directly compare expression levels in MG across different treatment  
279 paradigms we isolated and re-aggregated MG from different treatment groups, including  
280 retinas treated with the combination of NMDA+insulin+FGF2, NMDA alone and  
281 insulin+FGF2 alone. Resting MG, activated MG from 24 hrs after NMDA-treatment and  
282 2 doses of insulin+FGF2 formed distinct clusters of cells (Fig. 2a,b). Further, MGPCs  
283 formed discrete regions of cells wherein cell cycle progression formed the basis of

284 spatial segregation with the majority of cells progressing through the cell cycle from  
285 retinas at 72 hrs after NMDA or NMDA+FGF2+insulin treatment (Fig. 2c,e). The largest  
286 increase in levels and prevalence of expression of *CNR1* was observed in reactive MG  
287 from 48+72hrs after NMDA (Fig. 2f,g). By comparison, the largest decrease in levels  
288 and prevalence of expression of *MGLL*, *DAGLA*, *DAGLB* and *NAPEPLD* were observed  
289 for MG clustered among treatments with insulin+FGF2 and in the MGPC3 cluster (Fig.  
290 2f,g). Collectively, these findings suggest that the expression of *CNR1* by MG is  
291 changed in response to neuronal damage, whereas levels of *MGLL* and other eCB-  
292 related genes were down-regulated by treatment with NMDA (neuronal damage) or  
293 insulin and FGF2 (no neuronal damage).

294

### 295 **eCBs promote the formation of MGPCs after damage**

296 Although patterns of gene expression can be complex and context dependent,  
297 dynamic changes in mRNA levels are strongly correlated with changes in protein levels  
298 and function (Liu et al., 2016). Accordingly, we tested activation of eCB-signaling  
299 influence glial reactivity, neuronal survival and the formation of MGPCs. The ligand  
300 binding affinity of chick CNR receptors remains uncertain. Thus, 2-AG and AEA were  
301 co-injected to maximize the probability of activation of CNR1 receptors. We tested  
302 whether co-injection of 2-AG and AEA influenced the formation of proliferating MGPCs.  
303 Compared to numbers of proliferating MGPCs in NMDA-damaged retinas, treatment  
304 with eCBs resulted in a significant increase in numbers of Sox2/EdU-positive MGPCs  
305 (Fig. 3a,b). Consistent with these findings, numbers of proliferating MGPCs that  
306 expressed neurofilament and phospho-histone H3 (pHH3) were significantly increased

307 by treatment with 2-AG and AEA (Fig. 3c,d). Levels of retinal damage influence the  
308 reprogramming of MG; there is a positive correlation between numbers of dying cells  
309 and numbers of proliferating MGPCs (Fischer and Reh, 2001; Fischer et al., 2004).  
310 Accordingly, we probed for numbers of dying cells by labeling for fragmented DNA using  
311 the TUNEL method. The number of TUNEL-positive cells was unchanged by 2-AG and  
312 AEA, suggesting that levels of cell death in NMDA-damaged retinas were unaffected by  
313 addition of eCBs (Fig 3e,f).

314

### 315 **Targeting the eCB synthesis and degradation influences MG reprogramming**

316 Since expression levels of eCB-related genes were changed in NMDA-damaged  
317 retinas, we investigated whether levels of eCBs were influenced by damage or drugs  
318 that interfere with synthesis or degradation of AEA and 2-AG. We applied Orlistat, an  
319 inhibitor of DAGL, to reduce eCB synthesis and JJKK-048, an inhibitor to MGLL, to  
320 suppress eCB degradation (Hillard, 2015). By using competitive inhibition ELISAs, we  
321 measured levels 2-AG and AEA in retinas treated with NMDA and inhibitors. We  
322 detected low levels of 2-AG in the retina, that did not significantly change with NMDA  
323 damage at 72 hours (Fig. 4a). Although we failed to detect a significant change in 2-AG  
324 with Orlistat treatment, injections of JJKK-048 resulted in a significant increase in retinal  
325 levels of 2-AG (Fig. 4a). AEA was not detectable within the threshold range of the  
326 ELISA; thus, inhibitor treatments had no detectable impact on levels of AEA (Fig. 4b).  
327 Since levels of AEA fell below levels of detection we did not probe for changes in AEA-  
328 levels following treatment with inhibitors of NAPEPLD or FAAH.

329 We next tested whether inhibition of enzymes that produce or degrade eCBs  
330 influence glial reactivity, cell death and the formation of MGPCs. We also targeted the

331 CNR1 receptor with a small molecule agonist and an antagonist. Win-55, 212-2  
332 (Win55) is a potent CNR agonist in humans, mice and chickens (Stincic and Hyson,  
333 2011). Rimonabant is a potent and selective antagonist that inhibits CNR1-mediated  
334 cell-signaling (Ádám et al., 2008) (Hillard, 2015). Activation of CNR1 with Win55  
335 increased numbers of proliferating MGPCs, whereas inhibition of CNR1 with rimonabant  
336 had the opposite effect (Fig. 4c,d,e). MGLL inhibitor (JJKK048), which increased levels  
337 of 2-AG (Fig. 4a), increased numbers of proliferating of MGPCs (Fig. 4f). By  
338 comparison, the DAGL inhibitor Orlistat significantly decreased numbers of MGPCs (Fig  
339 4g). Overall, treatments expected to increase eCB-signaling increased MG  
340 reprogramming and treatments to decrease eCB-signaling decreased MG  
341 reprogramming.

342 We next targeted enzymes that influence the synthesis (NAPEPLD) or  
343 degradation (FAAH) of AEA. Inhibition of NAPEPLD with ARN19784 had no effect upon  
344 numbers of proliferating MGPCs (Fig. 5a,b), whereas numbers of proliferating microglia  
345 were increased (Fig 5c,d) and numbers of proliferating NIRG cells and dying cells were  
346 decreased (Fig. 5e-h). By comparison, inhibition of FAAH with URB597 or PF-044 had  
347 no significant effect upon proliferating MGPCs, microglia and NIRG cells, or cell death  
348 (Fig. 5d,f,h). We bioinformatically isolated scRNA-seq data for microglia and performed  
349 a fine-grain analysis. Microglia formed discrete UMAP clustering of resting and  
350 activated microglia from control retinas and retinas at 3, 12 and 48 hrs after NMDA-  
351 treatment (Fig. 5i-l). We detected scattered expression of relatively high levels of *MGLL*  
352 and *NAPEPLD*, but no expression of *CNR1* (Fig. 5m) or *FAAH* (not shown).

353 Collectively, these data suggests that cells in chick retina support production of  
354 2-AG over AEA in the context of damage and reprogramming. Further the reactivity of  
355 some microglia and NIRG cells, but not MG, is influenced by inhibition of NAPEPLD,  
356 and these responses are consistent with patterns of expression seen in scRNA-seq  
357 databases.

358

### 359 **Microglia Reactivity and eCBs**

360 Retinal microglia serve homeostatic functions and mediate inflammation in  
361 response to damage and pathogens (Silverman and Wong, 2018). In response to  
362 excitotoxic damage in the chick, the microglia become reactive, leading to accumulation  
363 of monocytes, proliferation, and upregulation of inflammatory cytokines (Fischer et al.,  
364 2014). Given the known association of microglia, inflammation and eCB-signaling  
365 (Stella, 2009) and the dependence of MGPC formation on signals provided by reactive  
366 microglial (Fischer et al., 2014; Palazzo et al., 2020), we investigated the impact of  
367 drugs targeting CNR1 and 2-AG metabolism on microglia reactivity, proliferation and  
368 reactivity.

369 Microglia are sparsely distributed and highly ramified when quiescent, but  
370 become reactive and transiently accumulate after NMDA-treatment (Fischer et al.,  
371 2014). We applied established metrics of microglia reactivity in the chick model (Gallina,  
372 2015), including microglia infiltration/accumulation, proliferation, CD45-intensity, cell  
373 area, and ramification were compared in different eCB targeted treatments. eCBs and  
374 small molecule inhibitors had no significant effect on the reactivity of microglia in  
375 damaged retinas (Fig. 6). Both the small molecule drugs and 2-AG/AEA did not



376 influence total numbers of CD45<sup>+</sup> cells compared to damage alone (Fig. 6a-c). Similarly,  
377 the number of proliferating CD45<sup>+</sup> cells was unaffected by eCB treatments in damaged  
378 retinas (Fig. 5a-c). Similarly, the area and intensity of CD45<sup>+</sup> immunolabeling were  
379 unaffected by drugs targeting eCBs (Fig. 6c). Using a Sholl analysis to quantify  
380 microglia shape, we quantified the maximum intersections (ramification index), mean  
381 intersections (centroid value), and maximum intersection radius (processes distribution).  
382 Although the morphology of resting microglia in saline treated retinas was significantly  
383 different from the morphology of microglia in NMDA-damaged retinas (Fig. 6d), the  
384 morphology of reactive microglia was unchanged by drugs targeting eCB receptors or  
385 metabolic enzymes (table 1).

386

### 387 **NF- $\kappa$ B activation is reduced in mouse MG when promoting eCB signaling**

388       NF- $\kappa$ B is a transcription factor known to be a primary transducer of the innate  
389 and adaptive immunity, and a central mediator of inflammatory responses to pathogens  
390 or tissue damage (Liu et al., 2017). In the chick, activation or inhibition of the NF- $\kappa$ B  
391 pathway has a significant impact on the ability of MG to become proliferating MGPCs  
392 (Palazzo et al., 2020). In the mouse retina, NF- $\kappa$ B-signaling has been implicated a  
393 signaling “hub” that may act to drive MG into a reactive state and then back into a  
394 resting state (Hoang et al., 2020). Accordingly, we investigated the anti-inflammatory  
395 properties of eCBs using the NF- $\kappa$ B reporter in the mouse retina. We used the mouse  
396 model because there are no cell-level read-outs of NF- $\kappa$ B-signaling available in the  
397 chick (Palazzo et al., 2020).

398 We first assessed the patterns of expression of eCB-related factors in normal  
399 and NMDA-damaged mouse retinas in aggregated scRNA-seq libraries. UMAP analysis  
400 of cells from control and damaged retinas revealed discrete clusters of cell types (Fig.  
401 7a). Neurons from control and damaged retinas were clustered together regardless of  
402 time after NMDA-treatment (Fig. 7a). By contrast, resting MG, including MG from 48 to  
403 72 hr after NMDA, and activated MG from 3, 6, 12, and 24 hr after treatment were  
404 spatially separated across the UMAP plot (Fig. 7c). Consistent with previous reports  
405 (Bouchard et al., 2015), *Cnr1* was detected in amacrine and ganglion cells (Fig. 7d),  
406 whereas *Cnr2* was not detected at significant levels in any retinal cells (not shown). By  
407 comparison, *Daglb* was detected in many retinal neurons including photoreceptors and  
408 bipolar cells, and *Mgll* was detected prominently in ganglion cells, glycinergic amacrine  
409 cells, and resting MG (Fig. 7e), similar to patterns seen in chick retinas (Fig. 1). *Dagla*  
410 was not detected (not shown). Although *Napepld* was not widely expressed, *Faah* had  
411 scattered expression in bipolar cells, and rod and cone photoreceptors (Fig. 7f).

412 We utilized the cis-NF- $\kappa$ B<sup>eGFP</sup> reporter mouse line to visualize cells where p65 is  
413 driving transcription as a read-out of NF- $\kappa$ B-signaling (Magness et al., 2004). In  
414 undamaged retinas, NF $\kappa$ B reporter was observed in a few endothelial cell whereas  
415 eGFP reporter was not detected in any retinal neurons or glia (Fig. 8a). At 48hrs after  
416 NMDA damage significant numbers of MG express NF $\kappa$ B-eGFP (Fig. 8a,b). Treatment  
417 with CNR1 agonist Win55 or eCBs (2-AG/AEA) resulted in a significant reduction in  
418 numbers of MG that were eGFP-positive (Fig. 8a,c). By contrast, treatment with CNR1  
419 antagonist (Rimonabant) significantly increased numbers of eGFP-positive MG (Fig.  
420 8a,c). To determine if changes in cell death were influenced eCBs we performed

421 TUNEL staining. There was no change in cell death in retinas treated with eCBs,  
422 Rimonabant or Win55 (Fig. 8d,e). In addition, there was there was no obvious change  
423 in microglial morphology (Fig. 8f) and no significant change in the accumulation of  
424 microglia in damaged retinas treated with eCBs, Rimonabant or Win55 (Fig. 8g). These  
425 data suggest that eCBs influence NF- $\kappa$ B signaling in mammalian MG, whereas  
426 neuroprotection and microglial reactivity are unaffected.

427

## 428 **Discussion:**

429 In this study we investigated the roles of eCB-signaling in the chick model of MG  
430 reprogramming. Retinal cells widely expressed both *CNR1* and genes involved in the  
431 synthesis and degradation of eCBs. The levels of expression and proportion of MG that  
432 express these genes significantly change following damage and during the transition to  
433 a proliferating progenitor-like cell. These changes in expression imply functions for  
434 eCBs in damaged retinas and during the formation of MGPCs. Indeed, we found that  
435 reprogramming of MG into proliferating MGPCs was promoted by eCBs and by *CNR1*  
436 agonists or enzyme inhibitor that increase retinal levels of 2-AG. Microglia maintained a  
437 reactive phenotype in damaged retinas regardless of treatment with eCB drugs. These  
438 findings support recent reports that the inflammatory state of MG is important to the  
439 transition from resting to reactive, and then to a progenitor-like cell (Fischer et al., 2014;  
440 Hoang et al., 2020; White et al., 2017).

441

442 *eCB signaling gene expression*

443 In the embryonic chick retina the expression of CNR1 and MGLL has been  
444 reported in MG (da Silva Sampaio et al., 2018). In addition to expression in MG, we  
445 detected *CNR1* in MG and in a population of amacrine cells and MGLL was detected in  
446 MG, some types of ganglion cells and oligodendrocytes. The eCB-related genes were  
447 present in MG but at low levels in a small proportion of MG. This pattern of expression  
448 is in contrast with high-expressing glial markers, such as glutamine synthetase (*GLUL*),  
449 retinaldehyde binding protein 1 (*RLBP1*) and carbonic anhydrase 2 (*CA2*) that are  
450 detected in >96% of MG in scRNA-seq preparations (Campbell et al., 2021; Palazzo et  
451 al., 2020). We believe this may be due to sensitivity limitations of the reagents wherein  
452 low-copy transcripts may not be readily detected. It is also possible that a sub-  
453 population of MG express eCB-related genes, suggesting heterogeneity among MG  
454 types. However, the eCB-expressing MG subsets are scattered homogenously in these  
455 clusters and do not correlate with unique markers corresponding to biologically unique  
456 subclusters.

457

#### 458 *Elevated eCBs promote MG reprogramming*

459 Although the roles of eCBs have been investigated in the visual system, little is  
460 known about how eCBs influence MG reprogramming in different models of retinal  
461 regeneration. We observed that exogenous eCB increased the proportion of MG that  
462 formed proliferating MGPCs. This effect was reproduced by inhibition of MGLL with  
463 JJKK048 which is expected to increase retinal levels of 2-AG. Similarly, this drug has  
464 been validated to target MGLL and increase levels of 2-AG levels in mice (Hillard,  
465 2015). Orlistat has been shown to inhibit DAGL and suppress 2-AG synthesis in

466 humans (Bisogno et al., 2006). Although we observed a decrease in number of  
467 proliferating MGPCs with Orlistat treatment, we did not observe a significant decrease in  
468 2-AG as measured by ELISA. This may have resulted from the low sensitivity threshold  
469 for detecting 2-AG. These lipids represent a very small fraction of total lipids from  
470 whole-retina extracts. Alternatively, Orlistat could be targeting fatty acid synthase  
471 (FASN), disrupting lipid metabolism to influence retinal levels of 2-AG (Kridel et al.,  
472 2004).

473 We examined whether CNR1 may have mediated eCB effects applying selective  
474 agonists and antagonists, drugs with validated specificity in the chick CNS (Ádám et al.,  
475 2008; Stincic and Hyson, 2011). We observed complimentary effects with Win55 (CNR1  
476 agonist) increasing and rimonabant (CNR1 antagonist) decreasing numbers of  
477 proliferating MGPCs. Nevertheless, we cannot exclude the possibility that these effects  
478 are due to indirect actions at MG given that amacrine and ganglion cells express  
479 significant levels of *CNR1* and may have mediated effects on MGPCs through  
480 secondary factors. We failed to detect *CNR1* expression among microglia, NIRG cells or  
481 oligodendrocytes in normal retinas or after NMDA-treatment.

482 Our findings support the hypothesis that MG are receptive and responsive to  
483 eCBs. In different animal models and cell types changes in cell physiology are mediated  
484 via interactions and cross-talk with other cell-signaling pathways, such as Notch1  
485 (Frampton et al., 2010), mTor (Palazuelos et al., 2012), MAPK/PI-3K (Dalton et al.,  
486 2009), and Wnt signaling (Nalli et al., 2019). These cell-signaling pathways are known  
487 to be active and promote the reprogramming of MG into MGPCs in the chick model  
488 (Fischer et al., 2002; Gallina et al., 2016; Ghai et al., 2010; Zelinka et al., 2016).

489 However, we have yet to identify the interactions between eCB-signaling and other cell-  
490 signaling pathways that have been implicated in the reprogramming of MG. These  
491 connections may be difficult to identify in undamaged retinas given that homeostatic  
492 enzymes reduce eCB levels and because the sensitivity of MG to eCBs may increase  
493 after damage with increased prevalence of *CNR1*-expression among MG.

494

495 *eCBs are not neuroprotective to excitotoxic NMDA damage*

496 eCBs have been shown to provide neuroprotection in degenerative retinal  
497 diseases (Rapino et al., 2018). Recent articles have even suggested that 2-AG can  
498 mediate neuroprotection against AMPA toxicity in the rat retina (Kokona et al., 2021).  
499 We investigated eCB-related neuroprotection because levels of retinal damage and cell  
500 death are known to influence the reprogramming of MG in to MGPCs. Although,  
501 injections of 2-AG and AEA did not impact numbers of dying cells, the *CNR1* agonist  
502 Win55 increased cell death in the chick retina (supplemental Fig. 2a,b). This could result  
503 from interactions with ion channels that are known to occur with these lipophilic eCB  
504 ligands (Pertwee, 2010). Alternatively, differences in excitotoxicity with eCB  
505 administration could be due to targeting NMDA vs AMPA receptors in the damage  
506 model. (2021) reported the death of photoreceptors with AMPA-selective agonists,  
507 which does not occur with NMDA. In other disease models where 2-AG provides  
508 neuroprotection the mode of cellular damage is slow and progressive (Centonze et al.,  
509 2007), unlike our model of NMDA-induced excitotoxicity which acute and severe.

510

511 *Microglia reactivity is not influenced by eCBs*

512           eCBs are believed to be potent anti-inflammatory drugs in the CNS (Ullrich et al.,  
513 2007). This is frequently suggested as mechanism of clinical benefit in pathological  
514 states. In the chick model of reprogramming, we have used dexamethasone GCR  
515 receptor agonist to repress the reactivity of microglia (Gallina, 2015). Similarly, treating  
516 damaged retinas with NF-kB inhibitor sulfasalazine also resulted in a decrease in the  
517 reactive proliferation of CD45<sup>+</sup> cells (Palazzo et al., 2020). With eCBs and small  
518 molecule drugs, there was no evidence that the reactivity of the microglia was  
519 influenced. Studies have demonstrated that reduced accumulation of reactive microglia  
520 results in neuroprotective effects whereas increased accumulation of microglial  
521 reactivity can be detrimental to neuronal survival (Fischer et al., 2015; Todd et al., 2019)  
522 (Fischer et al., 2105 Glia; Todd et al., 2019 J Neuroinflam; other refs). In the current  
523 study, however, inhibition of NAPEPLD increased the accumulation of reactive  
524 microglia, while numbers of dying cells were reduced. This may have resulted from  
525 multiple cellular targets being directly affected by the NAPEPLD inhibitor since  
526 *NAPEPLD* was detected in microglia, MG and inner retinal neurons.

527           Our findings are consistent with the notion that eCB-signaling is, in part,  
528 manifested through MG. However, we cannot exclude the possibility of eCBs mediate  
529 changes in production pro-inflammatory cytokines from reactive microglia in damaged  
530 retinas. The relationship between these inflammatory factors and MGPC formation is  
531 complex and time-dependent. For example, decreased retinal inflammation from  
532 inhibition of microglial reactivity with glucocorticoid agonists reduced MGPC formation,  
533 whereas decreased retinal inflammation from inhibition of NFkB-signaling increased  
534 MGPC formation (Gallina, 2015; Palazzo et al., 2020). However, the impact of NFkB-

535 signaling on the formation of MGPCs was reversed when the microglia were ablated  
536 (Palazzo et al., 2020). Pro-inflammatory factors likely directly influence MG, with  
537 evidence that MG activate NF- $\kappa$ B-signaling and express cytokine receptors in damaged  
538 retinas (Palazzo et al., 2020). Further studies are required to determine the impact of  
539 pro-inflammatory signals on microglia and MG in eCB-treated retinas to better  
540 characterize the coordination between these glial cells.

541

#### 542 *eCBs repress NF- $\kappa$ B in mouse MG*

543 While reporter lines for MG do not exist in the chick model, the mouse model of  
544 retinal damage was applied to the cis-NF- $\kappa$ B<sup>eGFP</sup> reporter line to identify cells where p65  
545 translocates into the nucleus and drives the expression of the eGFP-reporter. We find  
546 that MG are the primary cell type that activates NF- $\kappa$ B-signaling in NMDA-damaged  
547 retinas. This supports prior findings in chick that MG respond to proinflammatory  
548 cytokines such as TNF associated with NF- $\kappa$ B signaling (Palazzo et al., 2020). After  
549 damage eCBs reduced numbers of GFP<sup>+</sup> MG, suggesting that eCBs limit the activation  
550 of NF- $\kappa$ B in support cells. NF- $\kappa$ B has been implicated as an important pathway in mouse  
551 retina that may mediate a switch between reactive gliosis and resting MG (Hoang et al.,  
552 2020). Recent studies focused on MG reprogramming have highlighted the importance  
553 of the interactions between microglia and MG. The ablation of microglia with CSF1R  
554 inhibitor have a dramatic impact on the neurogenic capacity of MG that overexpress  
555 *Ascl1* (Todd et al., 2020). The absence of microglia induced transcriptomic changes in  
556 MG which included the repression of gliosis-associated genes (Todd et al., 2020). The



557 context, timing and specific cell-signaling pathways that influence the reprogramming  
558 capacity of MG in the mammalian retina requires further investigation.

559

560 **Conclusions:**

561 In this study we investigated the impact of eCBs on retinal inflammation and MG  
562 reprogramming in the chick model. We found transcriptomic evidence of eCB genes  
563 expressed by MG and the expression of these genes was dynamic following injury and  
564 during the transition into MGPCs. Increasing levels of eCBs through intravitreal  
565 injections or upregulation of 2-AG via enzyme inhibitors increased numbers of  
566 proliferating MGPCs. Surprisingly, cell death and microglia reactivity were largely  
567 unaffected by experimental manipulation of levels eCBs in both chick and mouse  
568 models of retinal damage. These data support recent evidence that inflammatory  
569 signaling play a pivotal role in regulating reactive gliosis, promoting the de-differentiation  
570 in MG, and suppressing the neurogenic capacity of MGPCs.

571

572 **Author contributions:** WAC – experimental design, execution of experiments,  
573 collection of data, data analysis, construction of figures and writing the manuscript. SB  
574 and AR - execution of experiments, collection of data and data analysis. TH and SB  
575 facilitated the single cell experiments. AJF – experimental design, data analysis,  
576 construction of figures and writing the manuscript.

577

578 **Competing Interests:** The authors have no competing interests to declare.

579

580 **Data availability:** RNA-Seq data are deposited in GitHub

581 <https://github.com/jiewwwang/Single-cell-retinal-regeneration>

582 [https://github.com/fischerlab3140/scRNAseq\\_libraries](https://github.com/fischerlab3140/scRNAseq_libraries)

583 scRNA-Seq data can be queried at

584 <https://proteinpaint.stjude.org/F/2019.retina.scRNA.html>.

585

586

587 **References:**

- 588 Ádám, Á.S., Wenger, T., and Csillag, A. (2008). The cannabinoid CB1 receptor antagonist  
589 rimonabant dose-dependently inhibits memory recall in the passive avoidance task in domestic  
590 chicks (*Gallus domesticus*). *Brain Research Bulletin* 76, 272–274.
- 591 Bisogno, T., Delton-Vandenbroucke, I., Milone, A., Lagarde, M., and Di Marzo, V. (1999).  
592 Biosynthesis and Inactivation of N-Arachidonylethanolamine (Anandamide) and N-  
593 Docosahexaenylethanolamine in Bovine Retina. *Archives of Biochemistry and Biophysics* 370,  
594 300–307.
- 595 Bisogno, T., Cascio, M.G., Saha, B., Mahadevan, A., Urbani, P., Minassi, A., Appendino, G.,  
596 Saturnino, C., Martin, B., Razdan, R., et al. (2006). Development of the first potent and specific  
597 inhibitors of endocannabinoid biosynthesis. *Biochimica et Biophysica Acta (BBA) - Molecular*  
598 *and Cell Biology of Lipids* 1761, 205–212.
- 599 Bouchard, J.-F., Casanova, C., Cécyre, B., and Redmond, W.J. (2015). Expression and  
600 Function of the Endocannabinoid System in the Retina and the Visual Brain (Hindawi).
- 601 Bouskila, J., Javadi, P., Casanova, C., Ptito, M., and Bouchard, J.-F. (2013). Müller cells  
602 express the cannabinoid CB2 receptor in the vervet monkey retina. *Journal of Comparative*  
603 *Neurology* 521, 2399–2415.
- 604 Butler, A., Hoffman, P., Smibert, P., Papalexi, E., and Satija, R. (2018). Integrating single-cell  
605 transcriptomic data across different conditions, technologies, and species. *Nature Biotechnology*  
606 36, 411–420.
- 607 Campbell, W.A., Deshmukh, A., Blum, S., Todd, L., Mendonca, N., Weist, J., Zent, J., Hoang,  
608 T.V., Blackshaw, S., Leight, J., et al. (2019). Matrix-metalloproteinase expression and  
609 gelatinase activity in the avian retina and their influence on Müller glia proliferation.  
610 *Experimental Neurology* 320, 112984.
- 611 Campbell, W.A., Fritsch-Kelleher, A., Palazzo, I., Hoang, T., Blackshaw, S., and Fischer, A.J.  
612 (2021). Midkine is neuroprotective and influences glial reactivity and the formation of Müller glia-  
613 derived progenitor cells in chick and mouse retinas. *Glia* *n/a*, 1–25.
- 614 Centonze, D., Finazzi-Agrò, A., Bernardi, G., and Maccarrone, M. (2007). The endocannabinoid  
615 system in targeting inflammatory neurodegenerative diseases. *Trends in Pharmacological*  
616 *Sciences* 28, 180–187.
- 617 Dalton, G.D., Bass, C.E., Van Horn, C., and Howlett, A.C. (2009). Signal Transduction via  
618 Cannabinoid Receptors. *CNS Neurol Disord Drug Targets* 8, 422–431.
- 619 Diana, M.A., and Bregestovski, P. (2005). Calcium and endocannabinoids in the modulation of  
620 inhibitory synaptic transmission. *Cell Calcium* 37, 497–505.
- 621 Fischer, A.J., and Reh, T.A. (2001). Muller glia are a potential source of neural regeneration in  
622 the postnatal chicken retina. *Nat Neurosci* 4, 247–252.

- 623 Fischer, A.J., Seltner, R.L.P., Poon, J., and Stell, W.K. (1998). Immunocytochemical  
624 characterization of quisqualic acid- and N-methyl-D-aspartate-induced excitotoxicity in the retina  
625 of chicks. *Journal of Comparative Neurology* 393, 1–15.
- 626 Fischer, A.J., McGuire, C.R., Dierks, B.D., and Reh, T.A. (2002). Insulin and Fibroblast Growth  
627 Factor 2 Activate a Neurogenic Program in Müller Glia of the Chicken Retina. *J. Neurosci.* 22,  
628 9387–9398.
- 629 Fischer, A.J., Schmidt, M., Omar, G., and Reh, T.A. (2004). BMP4 and CNTF are  
630 neuroprotective and suppress damage-induced proliferation of Muller glia in the retina. *Mol Cell*  
631 *Neurosci* 27, 531–542.
- 632 Fischer, A.J., Foster, S., Scott, M.A., and Sherwood, P. (2008). The transient expression of LIM-  
633 domain transcription factors is coincident with the delayed maturation of photoreceptors in the  
634 chicken retina. *J Comp Neurol* 506, 584–603.
- 635 Fischer, A.J., Scott, M.A., Ritchey, E.R., and Sherwood, P. (2009a). Mitogen-activated protein  
636 kinase-signaling regulates the ability of Müller glia to proliferate and protect retinal neurons  
637 against excitotoxicity. *Glia* 57, 1538–1552.
- 638 Fischer, A.J., Scott, M.A., Ritchey, E.R., and Sherwood, P. (2009b). Mitogen-activated protein  
639 kinase-signaling regulates the ability of Müller glia to proliferate and protect retinal neurons  
640 against excitotoxicity. *Glia* 57, 1538–1552.
- 641 Fischer, A.J., Scott, M.A., and Tuten, W. (2009c). Mitogen-activated protein kinase-signaling  
642 stimulates Muller glia to proliferate in acutely damaged chicken retina. *Glia* 57, 166–181.
- 643 Fischer, A.J., Zelinka, C., Gallina, D., Scott, M.A., and Todd, L. (2014). Reactive microglia and  
644 macrophage facilitate the formation of Müller glia-derived retinal progenitors. *Glia* 62, 1608–  
645 1628.
- 646 Fischer, A.J., Zelinka, C., and Milani-Nejad, N. (2015). Reactive retinal microglia, neuronal  
647 survival, and the formation of retinal folds and detachments. *Glia* 63, 313–327.
- 648 Frampton, G., Coufal, M., Li, H., Ramirez, J., and DeMorrow, S. (2010). Opposing actions of  
649 endocannabinoids on cholangiocarcinoma growth is via the differential activation of Notch  
650 signaling. *Exp Cell Res* 316, 1465–1478.
- 651 Gallina, D.Z., C.P. Cebulla, C.M. Fischer, A.J. (2015). Activation of glucocorticoid receptors in  
652 Müller glia is protective to retinal neurons and suppresses microglial reactivity. *Exp Neurol* 273,  
653 114–125.
- 654 Gallina, D., Palazzo, I., Steffenson, L., Todd, L., and Fischer, A.J. (2016). Wnt/ $\beta$ -catenin-  
655 signaling and the formation of Müller glia-derived progenitors in the chick retina. *Developmental*  
656 *Neurobiology* 76, 983–1002.
- 657 Ghai, K., Zelinka, C., and Fischer, A.J. (2009). Serotonin released from amacrine neurons is  
658 scavenged and degraded in bipolar neurons in the retina. *J Neurochem* 111, 1–14.
- 659 Ghai, K., Zelinka, C., and Fischer, A.J. (2010). Notch signaling influences neuroprotective and  
660 proliferative properties of mature Muller glia. *J Neurosci* 30, 3101–3112.

- 661 Hillard, C.J. (2015). The Endocannabinoid Signaling System in the CNS. In *International Review*  
662 *of Neurobiology*, (Elsevier), pp. 1–47.
- 663 Hoang, T., Wang, J., Boyd, P., Wang, F., Santiago, C., Jiang, L., Yoo, S., Lahne, M., Todd, L.J.,  
664 Jia, M., et al. (2020). Gene regulatory networks controlling vertebrate retinal regeneration.  
665 *Science* 370.
- 666 Hu, S.S.-J., Arnold, A., Hutchens, J.M., Radicke, J., Cravatt, B.F., Wager-Miller, J., Mackie, K.,  
667 and Straiker, A. (2010). Architecture of cannabinoid signaling in mouse retina. *J Comp Neurol*  
668 518, 3848–3866.
- 669 Inoue, M., Nakayama, C., and Noguchi, H. (1996). Activating mechanism of CNTF and related  
670 cytokines. *Mol Neurobiol* 12, 195–209.
- 671 Iribarne, M., Hyde, D.R., and Masai, I. (2019). TNF $\alpha$  Induces Müller Glia to Transition From  
672 Non-proliferative Gliosis to a Regenerative Response in Mutant Zebrafish Presenting Chronic  
673 Photoreceptor Degeneration. *Front. Cell Dev. Biol.* 7.
- 674 Kokona, D., Spyridakos, D., Tzatzarakis, M., Papadogkonaki, S., Filidou, E., Arvanitidis, K.I.,  
675 Kolios, G., Lamani, M., Makriyannis, A., Malamas, M.S., et al. (2021). The endocannabinoid 2-  
676 arachidonoylglycerol and dual ABHD6/MAGL enzyme inhibitors display neuroprotective and  
677 anti-inflammatory actions in the in vivo retinal model of AMPA excitotoxicity.  
678 *Neuropharmacology* 185, 108450.
- 679 Kridel, S.J., Axelrod, F., Rozenkrantz, N., and Smith, J.W. (2004). Orlistat Is a Novel Inhibitor of  
680 Fatty Acid Synthase with Antitumor Activity. *Cancer Res* 64, 2070–2075.
- 681 Kumar, A., and Shamsuddin, N. (2012). Retinal Muller Glia Initiate Innate Response to  
682 Infectious Stimuli via Toll-Like Receptor Signaling. *PLOS ONE* 7, e29830.
- 683 Kumar, A., Pandey, R.K., Miller, L.J., Singh, P.K., and Kanwar, M. (2013). Müller Glia in Retinal  
684 Innate Immunity: A perspective on their roles in endophthalmitis. *Crit Rev Immunol* 33, 119–135.
- 685 Liu, T., Zhang, L., Joo, D., and Sun, S.-C. (2017). NF- $\kappa$ B signaling in inflammation. *Signal*  
686 *Transduct Target Ther* 2, 17023.
- 687 Magness, S.T., Jijon, H., Van Houten Fisher, N., Sharpless, N.E., Brenner, D.A., and Jobin, C.  
688 (2004). In vivo pattern of lipopolysaccharide and anti-CD3-induced NF-kappa B activation using  
689 a novel gene-targeted enhanced GFP reporter gene mouse. *J Immunol* 173, 1561–1570.
- 690 Matsuda, S., Kanemitsu, N., Nakamura, A., Mimura, Y., Ueda, N., Kurahashi, Y., and  
691 Yamamoto, S. (1997). Metabolism of Anandamide, an Endogenous Cannabinoid Receptor  
692 Ligand, in Porcine Ocular Tissues. *Experimental Eye Research* 64, 707–711.
- 693 Nagarkatti, P., Pandey, R., Rieder, S.A., Hegde, V.L., and Nagarkatti, M. (2009). Cannabinoids  
694 as novel anti-inflammatory drugs. *Future Med Chem* 1, 1333–1349.
- 695 Nalli, Y., Dar, M.S., Bano, N., Rasool, J.U., Sarkar, A.R., Banday, J., Bhat, A.Q., Rafia, B.,  
696 Vishwakarma, R.A., Dar, M.J., et al. (2019). Analyzing the role of cannabinoids as modulators of  
697 Wnt/ $\beta$ -catenin signaling pathway for their use in the management of neuropathic pain.  
698 *Bioorganic & Medicinal Chemistry Letters* 29, 1043–1046.

- 699 Palazuelos, J., Ortega, Z., Díaz-Alonso, J., Guzmán, M., and Galve-Roperh, I. (2012). CB2  
700 Cannabinoid Receptors Promote Neural Progenitor Cell Proliferation via mTORC1 Signaling \*.  
701 *Journal of Biological Chemistry* 287, 1198–1209.
- 702 Palazzo, I., Deistler, K., Hoang, T.V., Blackshaw, S., and Fischer, A.J. (2019). NF-κB signaling  
703 regulates the formation of proliferating Müller glia-derived progenitor cells in the avian retina.  
704 *BioRxiv* 724260.
- 705 Palazzo, I., Deistler, K., Hoang, T.V., Blackshaw, S., and Fischer, A.J. (2020). NF-κB signaling  
706 regulates the formation of proliferating Müller glia-derived progenitor cells in the avian retina.  
707 *Development*.
- 708 Pertwee, R.G. (2010). Receptors and Channels Targeted by Synthetic Cannabinoid Receptor  
709 Agonists and Antagonists. *Curr Med Chem* 17, 1360–1381.
- 710 Rapino, C., Tortolani, D., Scipioni, L., and Maccarrone, M. (2018). Neuroprotection by  
711 (Endo)Cannabinoids in Glaucoma and Retinal Neurodegenerative Diseases. *Curr*  
712 *Neuropharmacol* 16, 959–970.
- 713 Satija, R., Farrell, J.A., Gennert, D., Schier, A.F., and Regev, A. (2015). Spatial reconstruction  
714 of single-cell gene expression data. *Nat Biotechnol* 33, 495–502.
- 715 Schwitzer, T., Schwan, R., Angioi-Duprez, K., Giersch, A., and Laprevote, V. (2016). The  
716 Endocannabinoid System in the Retina: From Physiology to Practical and Therapeutic  
717 Applications. *Neural Plast* 2016.
- 718 Shamsuddin, N., and Kumar, A. (2011). TLR2 mediates the innate response of retinal Muller  
719 glia to *Staphylococcus aureus*. *J Immunol* 186, 7089–7097.
- 720 da Silva Sampaio, L., Kubrusly, R.C.C., Colli, Y.P., Trindade, P.P., Ribeiro-Resende, V.T.,  
721 Einicker-Lamas, M., Paes-de-Carvalho, R., Gardino, P.F., de Mello, F.G., and De Melo Reis,  
722 R.A. (2018). Cannabinoid Receptor Type 1 Expression in the Developing Avian Retina:  
723 Morphological and Functional Correlation With the Dopaminergic System. *Front Cell Neurosci*  
724 12.
- 725 Silverman, S.M., and Wong, W.T. (2018). Microglia in the Retina: Roles in Development,  
726 Maturity, and Disease. *Annual Review of Vision Science* 4, 45–77.
- 727 Slusar, J.E., Cairns, E.A., Szczesniak, A.-M., Bradshaw, H.B., Di Polo, A., and Kelly, M.E.M.  
728 (2013). The fatty acid amide hydrolase inhibitor, URB597, promotes retinal ganglion cell  
729 neuroprotection in a rat model of optic nerve axotomy. *Neuropharmacology* 72, 116–125.
- 730 Stanke, J., Moose, H.E., El-Hodiri, H.M., and Fischer, A.J. (2010). Comparative study of Pax2  
731 expression in glial cells in the retina and optic nerve of birds and mammals. *J Comp Neurol* 518,  
732 2316–2333.
- 733 Stella, N. (2009). Endocannabinoid signaling in microglial cells. *Neuropharmacology* 56, 244–  
734 253.
- 735 Stincic, T.L., and Hyson, R.L. (2011). The localization and physiological effects of cannabinoid  
736 receptor 1 (CB1) in the brain stem auditory system of the chick. *Neuroscience* 194C, 150–159.

- 737 Straiker, A.J., Maguire, G., Mackie, K., and Lindsey, J. (1999). Localization of Cannabinoid CB1  
738 Receptors in the Human Anterior Eye and Retina. *Invest. Ophthalmol. Vis. Sci.* *40*, 2442–2448.
- 739 Todd, L., and Fischer, A.J. (2015). Hedgehog-signaling stimulates the formation of proliferating  
740 Müller glia-derived progenitor cells in the retina. *Development* *142*, 2610–2622.
- 741 Todd, L., Palazzo, I., Suarez, L., Liu, X., Volkov, L., Hoang, T.V., Campbell, W.A., Blackshaw,  
742 S., Quan, N., and Fischer, A.J. (2019). Reactive microglia and IL1 $\beta$ /IL-1R1-signaling mediate  
743 neuroprotection in excitotoxin-damaged mouse retina. *Journal of Neuroinflammation* *16*, 118.
- 744 Todd, L., Finkbeiner, C., Wong, C.K., Hooper, M.J., and Reh, T.A. (2020). Microglia Suppress  
745 Ascl1-Induced Retinal Regeneration in Mice. *Cell Reports* *33*, 108507.
- 746 Ullrich, O., Merker, K., Timm, J., and Tauber, S. (2007). Immune control by endocannabinoids  
747 — New mechanisms of neuroprotection? *Journal of Neuroimmunology* *184*, 127–135.
- 748 White, D.T., Sengupta, S., Saxena, M.T., Xu, Q., Hanes, J., Ding, D., Ji, H., and Mumm, J.S.  
749 (2017). Immunomodulation-accelerated neuronal regeneration following selective rod  
750 photoreceptor cell ablation in the zebrafish retina. *PNAS* *114*, E3719–E3728.
- 751 Xu, J.-Y., and Chen, C. (2015). Endocannabinoids in Synaptic Plasticity and Neuroprotection.  
752 *Neuroscientist* *21*, 152–168.
- 753 Yang, W., Li, Q., Wang, S.-Y., Gao, F., Qian, W.-J., Li, F., Ji, M., Sun, X.-H., Miao, Y., and  
754 Wang, Z. (2016). Cannabinoid receptor agonists modulate calcium channels in rat retinal müller  
755 cells. *Neuroscience* *313*, 213–224.
- 756 Yazulla, S., Studholme, K.M., McINTOSH, H.H., and Fan, S.-F. (2000). Cannabinoid receptors  
757 on goldfish retinal bipolar cells: Electron-microscope immunocytochemistry and whole-cell  
758 recordings. *Visual Neuroscience* *17*, 391–401.
- 759 Zelinka, C.P., Volkov, L., Goodman, Z.A., Todd, L., Palazzo, I., Bishop, W.A., and Fischer, A.J.  
760 (2016). mTor signaling is required for the formation of proliferating Müller glia-derived progenitor  
761 cells in the chick retina. *Development* *143*, 1859–1873.
- 762 Zhao, X.F., Wan, J., Powell, C., Ramachandran, R., Myers, M.G., Jr., and Goldman, D. (2014).  
763 Leptin and IL-6 family cytokines synergize to stimulate muller glia reprogramming and retina  
764 regeneration. *Cell Rep* *9*, 272–284.
- 765  
766

767

768 **Figure legends:**

769

770 **Figure 1. eCB-related genes are widely expressed in different types of retinal**

771 **cells.** Panel **a** illustrates a schematic diagram of the enzymes and receptors involved

772 in eCB synthesis, degradation and signaling. scRNA-seq was used to identify patterns

773 of expression of eCB-related genes among retinal cells. Patterns and levels of

774 expression are presented in UMAP plots (**b-h**) and violin plots (**i**). scRNA-seq libraries

775 were aggregated from control and treated 3hr, 12hr, and 48hr after NMDA-treatment

776 (**b**). UMAP-ordered cells formed distinct clusters of neuronal cells, resting MG, early

777 activated MG, activated MG and late activated MG (**c-e**). UMAP heatmaps of *CNR1*,

778 *MGLL*, *NAPEPLD*, *DAGLA*, *DAGLB* and *FAAH* demonstrate patterns and levels of

779 expression across different retinal cells, with black dots representing cells with

780 expression of 2 or more genes (**f-h**). Violin plots illustrate relative levels and percent of

781 expression in resting and activated MG (**i**). Violin plots illustrate levels of gene

782 expression and significant changes (\* $p < 0.01$ , \*\* $p < 10 \times 10^{-10}$ , \*\*\* $p < 10 \times 10^{-20}$ ) in levels

783 that were determined by using a Wilcox rank sum with Bonferroni correction.

784

785 **Figure 2. eCB-related genes are dynamically expressed by MG in response to**

786 **damage or growth-factor treatment.** scRNA-seq was used to identify patterns of

787 expression of eCB genes in MG at several time points after NMDA damage or FGF +

788 insulin growth factor treatment to form MGPCs. UMAP- clusters of MG were identified

789 by expression of hallmark genes (**a,b,d**). Progenitors were then classified by different

790 cell cycle and progenitor markers (**c, e, f**). Each dot represents one cell and black dots



791 indicate cells with 2 or more genes expressed. The expression of eCB related genes  
792 was illustrated in a colored heatmap and in a violin plot violin plot with population  
793 percentages and statistical comparisons. (**g,h,i**). Significant difference (\* $p < 0.01$ ,  
794 \*\* $p < 0.0001$ , \*\*\* $p < 0.0001$ ) was determined by using a Wilcox rank sum with Bonferroni  
795 correction. MG – Müller glia, MGPC – Müller glia-derived progenitor cell.

796

797 **Figure 3. eCB increase numbers of proliferating MGPCs in damaged retinas.**

798 Chick eyes were injected with NMDA, AEA, 2-AG, and EdU according to the paradigm  
799 at the top figure. Eyes were harvested at 24 hrs after the last injection and retinas  
800 processed for immunolabeling. Retinas were labeled for Sox2 (green) and EdU<sup>+</sup> (red)  
801 cells (**a**), neurofilament (red), phospho-Histone H3 (pHisH3, green), and DAPI (blue; **d**).  
802 Dying cells were labeled using the TUNEL assay (**e**). Histograms illustrate the mean ( $\pm$   
803 SD) and each dot represents one biological replicate. Significance of difference (  
804 \*\* $p < 0.01$ , \*\*\* $p < 0.001$ ) was determined by using a paired *t*-test. Arrows indicate the  
805 nuclei of MG. The calibration bar panels **a**, **d** and **e** represent 50  $\mu\text{m}$ . Abbreviations:  
806 ONL – outer nuclear layer, INL – inner nuclear layer, IPL – inner plexiform layer, GCL –  
807 ganglion cell layer, NF – neurofilament, ns – not significant.

808

809 **Figure 4. Small molecule drug targeting CNR1, DAGL and MGLL influence the**  
810 **formation of MGPCs.** The treatment paradigm is illustrated at the top of the figure.

811 Compounds included Orlistat (DAGL inhibitor), JJKK048 (MGLL inhibitor), Win55  
812 (CNR1 agonist), and Rimonabant (CNR1 antagonist). Competitive inhibitor ELISAs of  
813 illustrate relative levels of 2-AG and AEA after NMDA damage and treatment with  
814 Orlistat or JJKK048 (**a,b**). Retinas were labeled for Sox2 (green) and EdU (red; **a**).

815 Arrows indicate EdU+/Sox2+ nuclei of MGPCs, small double-arrows indicate  
816 EdU+/Sox2+ nuclei of NIRG cells in the IPL, and hollow arrow-heads indicate  
817 EdU+/Sox- nuclei of presumptive microglia. The histograms in **a,b** and **d-g** represents  
818 the mean ( $\pm$  SD) and each dot represents one biological replicate retina. The calibration  
819 bar in **c** represents 50  $\mu$ m. Abbreviations: ONL – outer nuclear layer, INL – inner  
820 nuclear layer, IPL – inner plexiform layer, GCL – ganglion cell layer.

821

822 **Figure 5. Targeting the AEA pathway does not influence the formation of MGPCs.**

823 The treatment paradigm is illustrated at the top of the figure. Compounds included  
824 ARN19874 (NAPEPLD inhibitor), URB597 (FAAH inhibitor) and PF-044 (FAAH  
825 inhibitor). Eyes were harvested at 24 hrs after the last injection and retinas processed  
826 for immunofluorescence. Retinal sections were labeled for Sox2 (green) and EdU (red;  
827 **a**), CD45 (green) and EdU (red; **c**), Nkx2.2 (green) and EdU (red, **e**), and cell death  
828 (TUNEL, red; **g**). The histograms in **b,d,f,h** represents the mean ( $\pm$  SD) number of  
829 proliferating MGPCs (**b**), proliferating microglia (**d**), proliferating NIRG cells (**f**), and  
830 dying cells (**h**). Each dot represents one biological replicate retina. Arrows indicate  
831 EdU+/Sox2+ nuclei of MGPCs, small double-arrows indicate EdU+/Nkx2.2+ nuclei of  
832 NIRG cells in the IPL, and hollow arrow-heads indicate EdU+/CD45+ nuclei of microglia.  
833 The calibration bar in **g** represents 50  $\mu$ m and applies to panels **a,c,e** and **g**.  
834 Abbreviations: ONL – outer nuclear layer, INL – inner nuclear layer, IPL – inner  
835 plexiform layer, GCL – ganglion cell layer. Microglia were from aggregate scRNA-seq  
836 libraries were re-embedded and ordered in UMAP (**i**). Microglia from saline- and NMDA-  
837 treated retinas were clustered into resting, active and early activated cells (**j**). Clusters

838 of cells were arranged according to markers such as *TNFSF15*, *PPARG*, *IL1R2*, *DBI*  
839 and *AIR1L* (**k,l**). *MGLL* and *NAPEPLD* had scattered expression across microglia in  
840 different clusters, whereas *CNR1* was not widely expressed (**m**).

841

842 **Figure 6. Microglia reactivity in damaged retina treated with eCBs.** The treatment  
843 paradigm is illustrated at the top of the figure. Compounds included 2-AG+AEA (CNR1  
844 agonists), Orlistat (DAGL inhibitor), JJKK048 (MGLL inhibitor), Win55 (CNR1 agonist),  
845 and Rimonabant (CNR1 antagonist). Eyes were harvested 24hrs after the last injection  
846 and retinas were processed for immunofluorescence. Retinal sections were labeled for  
847 CD45 (green) and DAPI (blue; **a**), or CD45 (green), EdU (red) and DAPI (blue; **b**).  
848 Microglial reactivity was assessed by measuring CD45 area and intensity, proliferation  
849 (EdU+), and total number of microglia (CD45+/DRAQ5+) (**b**). Arrows indicate the nuclei  
850 of microglia. Histograms in **c** illustrate the mean ( $\pm$ SD, control n = 40, treatment n = 8)  
851 and each symbol represents one biological replicate. The shape of the microglia was  
852 assessed using a Sholl analysis. Representative microglia from each condition is  
853 shown, with a heat map of radial intersections (blue = low, red/white = high) (**c**). The  
854 graph in **d** illustrates of the number of processes radially ( $\mu\text{m}\pm\text{SE}$ ) from microglial nuclei  
855 from control (n=15) and NMDA damaged (n = 25) retinas. (**d**) Significance of difference  
856 was determined by using a one way ANOVA with corresponding Tukey's test. The  
857 calibration bars panels **a**, **b** represent 50  $\mu\text{m}$ , and the bar in **d** represents 5  $\mu\text{m}$ .  
858 Abbreviations: ONL – outer nuclear layer, INL – inner nuclear layer, IPL – inner  
859 plexiform layer, GCL – ganglion cell layer.

860

861 **Figure 7. Patterns of expression of eCB-related genes in normal and NMDA-**  
862 **damaged mouse retinas.** Cells were obtained from control retinas and from retinas at  
863 3, 6, 12, 24, 36, 48 and 72hrs after NMDA-treatment and clustered in UMAP plots with  
864 each dot representing an individual cell (a). UMAP plots revealed distinct clustering of  
865 different types of retinal cells; resting MG (a mix of control, 48hr and 72hr NMDA-tr), 12-  
866 72 hr NMDA-tr MG (activated MG in violin plots), 6hrs NMDA-tr MG, 3hrs NMDA-tr MG,  
867 microglia, astrocytes, RPE cells, endothelial cells, retinal ganglion cells, horizontal cells  
868 (HCs), amacrine cells (ACs), bipolar cells (BPs), rod photoreceptors, and cone  
869 photoreceptors (b). Resting and activated MG were identified based on patterns of  
870 expression of *Slc1a3*, *Nes* and *Vim* (c). Cells were colored with a heatmap of  
871 expression of *Cnr1*, *Daglb*, *Mgll*, *Napepld* and *Faah* expression (d-f). Black dots indicate  
872 cells that express two or more markers.

873

874 **Figure 8. eCBs and NF- $\kappa$ B-signaling in MG of damaged mouse retinas**

875 The treatment paradigm is illustrated at the top of the figure. Eyes of mice (cis-NF-  
876  $\kappa$ B<sup>eGFP</sup>) were pretreated with compounds or vehicle prior to NMDA + vehicle/compound,  
877 and retinas harvested 24 hrs after the last injection. Compounds included 2-AG+AEA  
878 (CNR1 agonists), Win55 (CNR1 agonist), and Rimonabant (CNR1 antagonist). Retinal  
879 sections were labeled for Sox9 (blue) and eGFP (green) (b), fragmented DNA using the  
880 TUNEL method (d), and Iba1 (red) and Draq5 (blue; f). The histogram/scatter-plots  
881 illustrate the mean ( $\pm$ SD) number of eGFP+ MG (c), dying cells (e) or Iba1+/Draq5+  
882 cells (g). Each dot represents one biological replicate. Significance of difference  
883 (\* $p$ <0.05) was determined by using a paired  $t$ -test. The calibration bars panels a, c, e,

884 and **g** represent 50  $\mu\text{m}$ . Abbreviations: ONL – outer nuclear layer, INL – inner nuclear  
885 layer, IPL – inner plexiform layer, GCL – ganglion cell layer.

886

887 **Figure 9. Summary Schematic of eCB effect on MG reprogramming.** Using scRNA-  
888 seq analysis, we identified patterns of expression of genes involved in eCB synthesis,  
889 degradation and signaling (**a**). ELISAs indicated a more prominent role of 2-AG over  
890 AEA, and drugs which elevated 2-AG signaling increased MGPCs after damage (**b**).  
891 Microglia were unresponsive to these treatments and retained a reactive phenotype in a  
892 damaged retina (**c**). In the NF-kBeGFP+ reporter mice, damage activates signaling in  
893 MG, which is decreased by exogenous eCBs or CNR1 agonists (**d**).

894

895 **Table 1. Sholl Analysis of microglia from the chick retina after damage and eCB**  
896 **treatment.** Statistical analysis was performed with a one-way ANOVA and Tukey's test  
897 (NMDA n = 25, treatments n = 15)

898

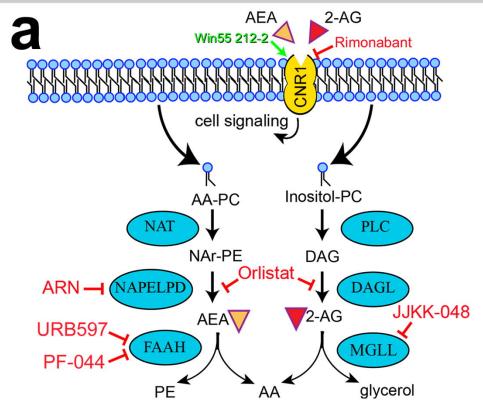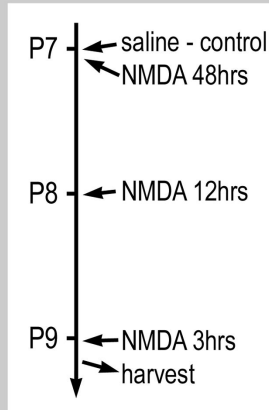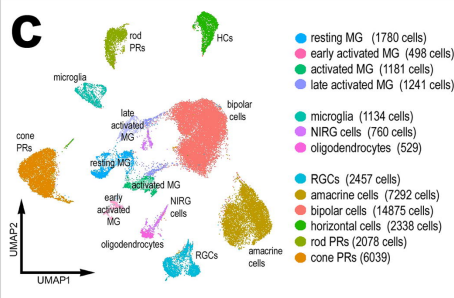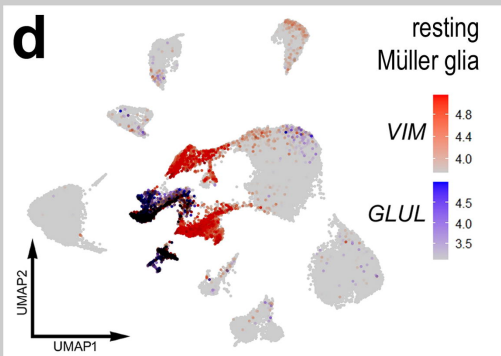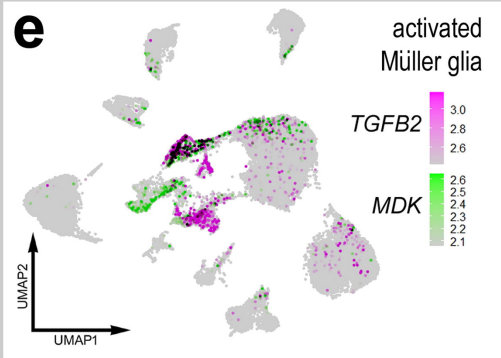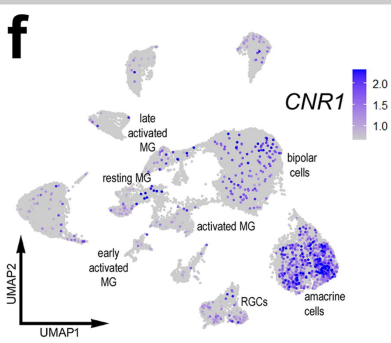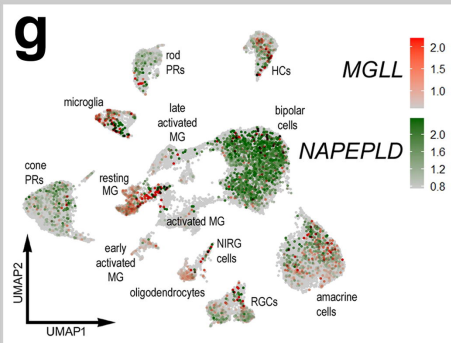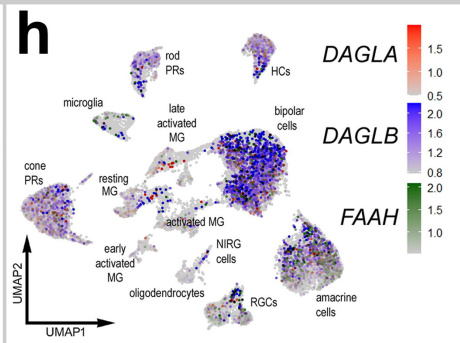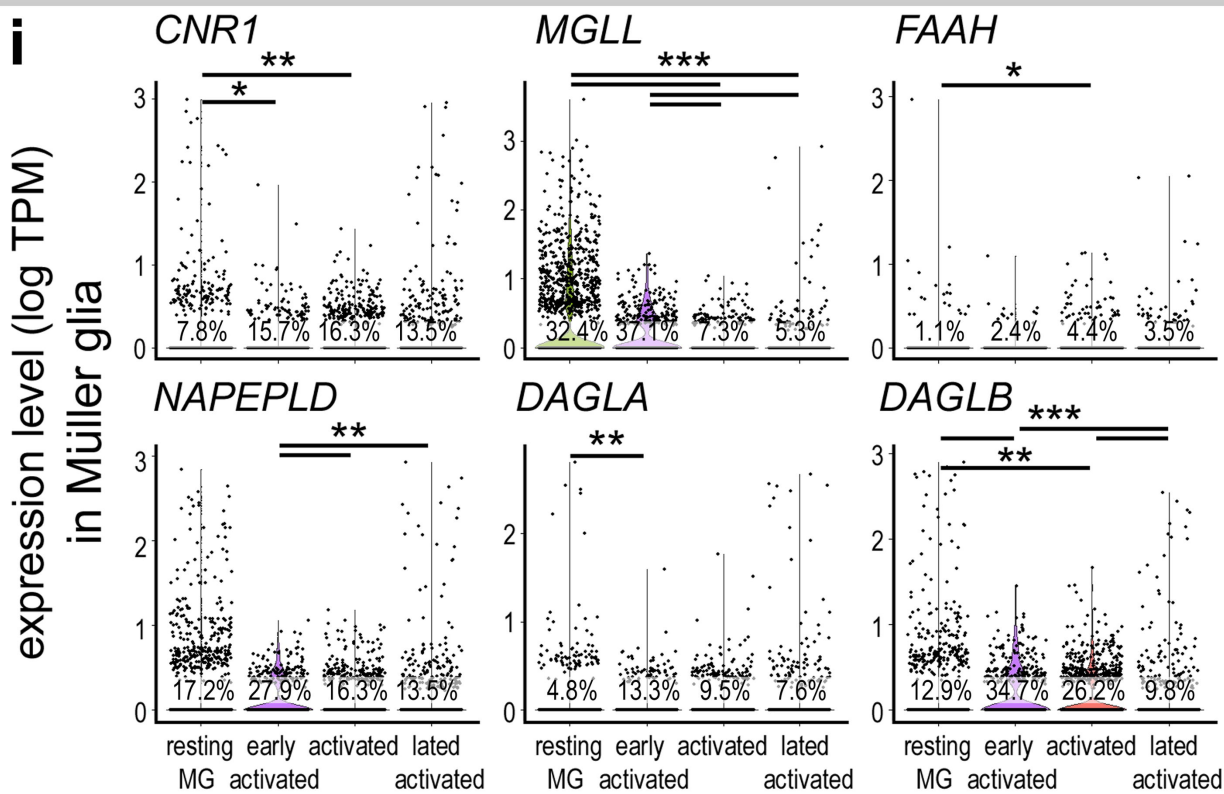



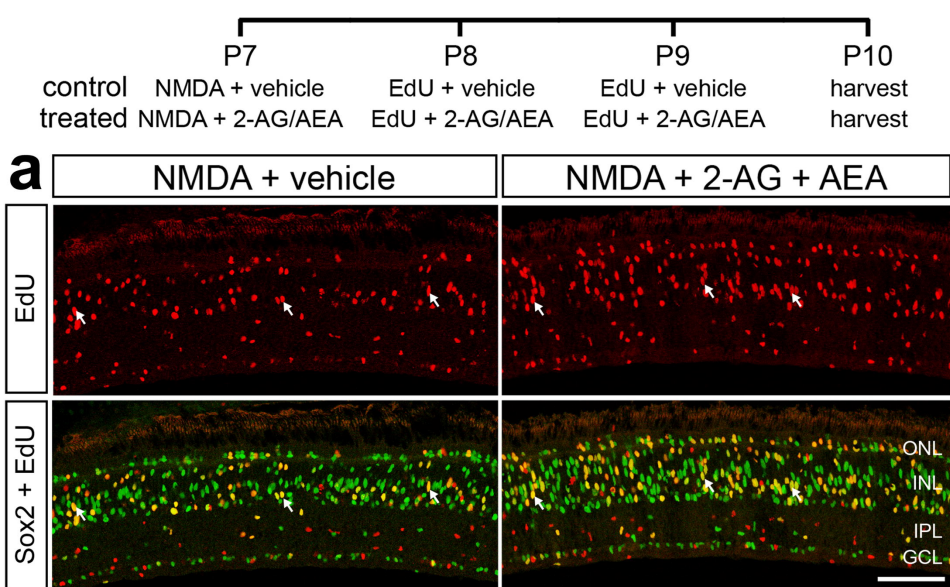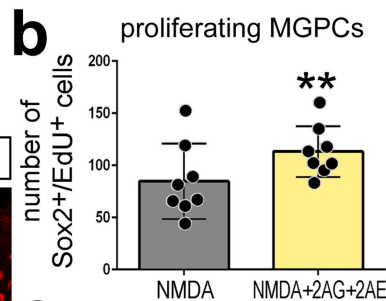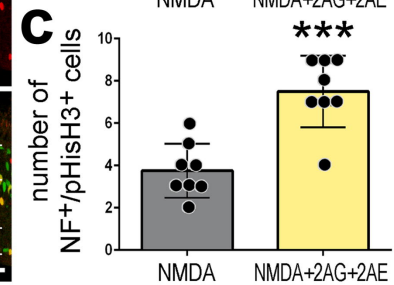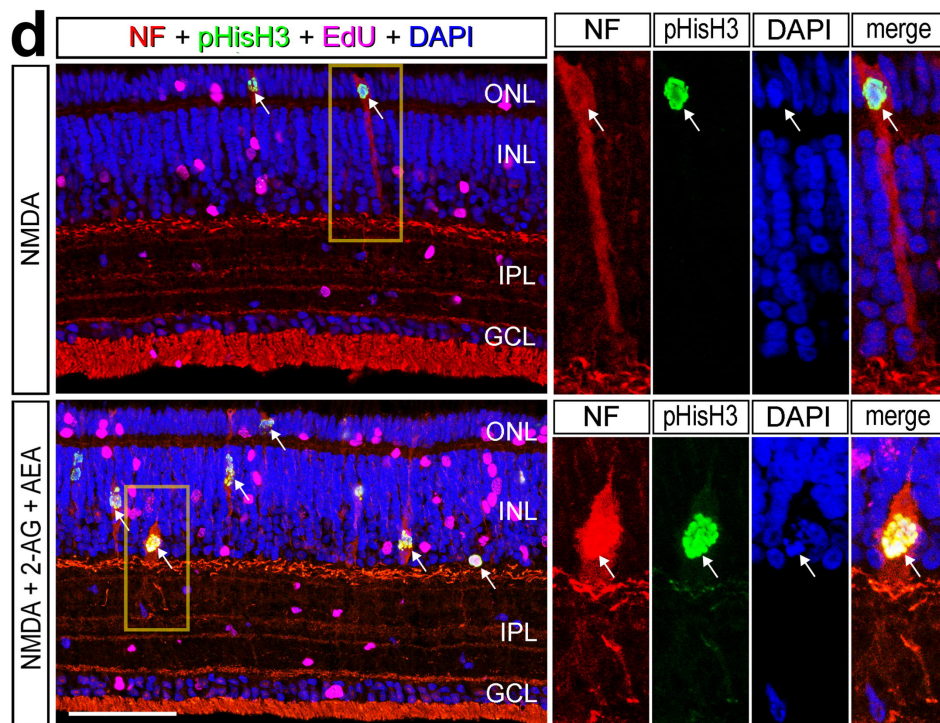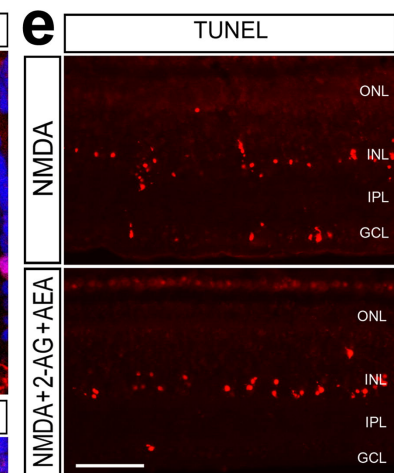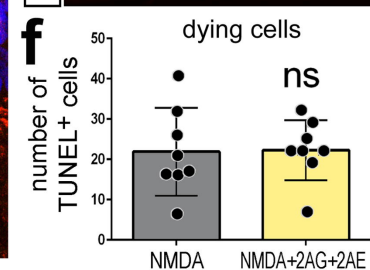



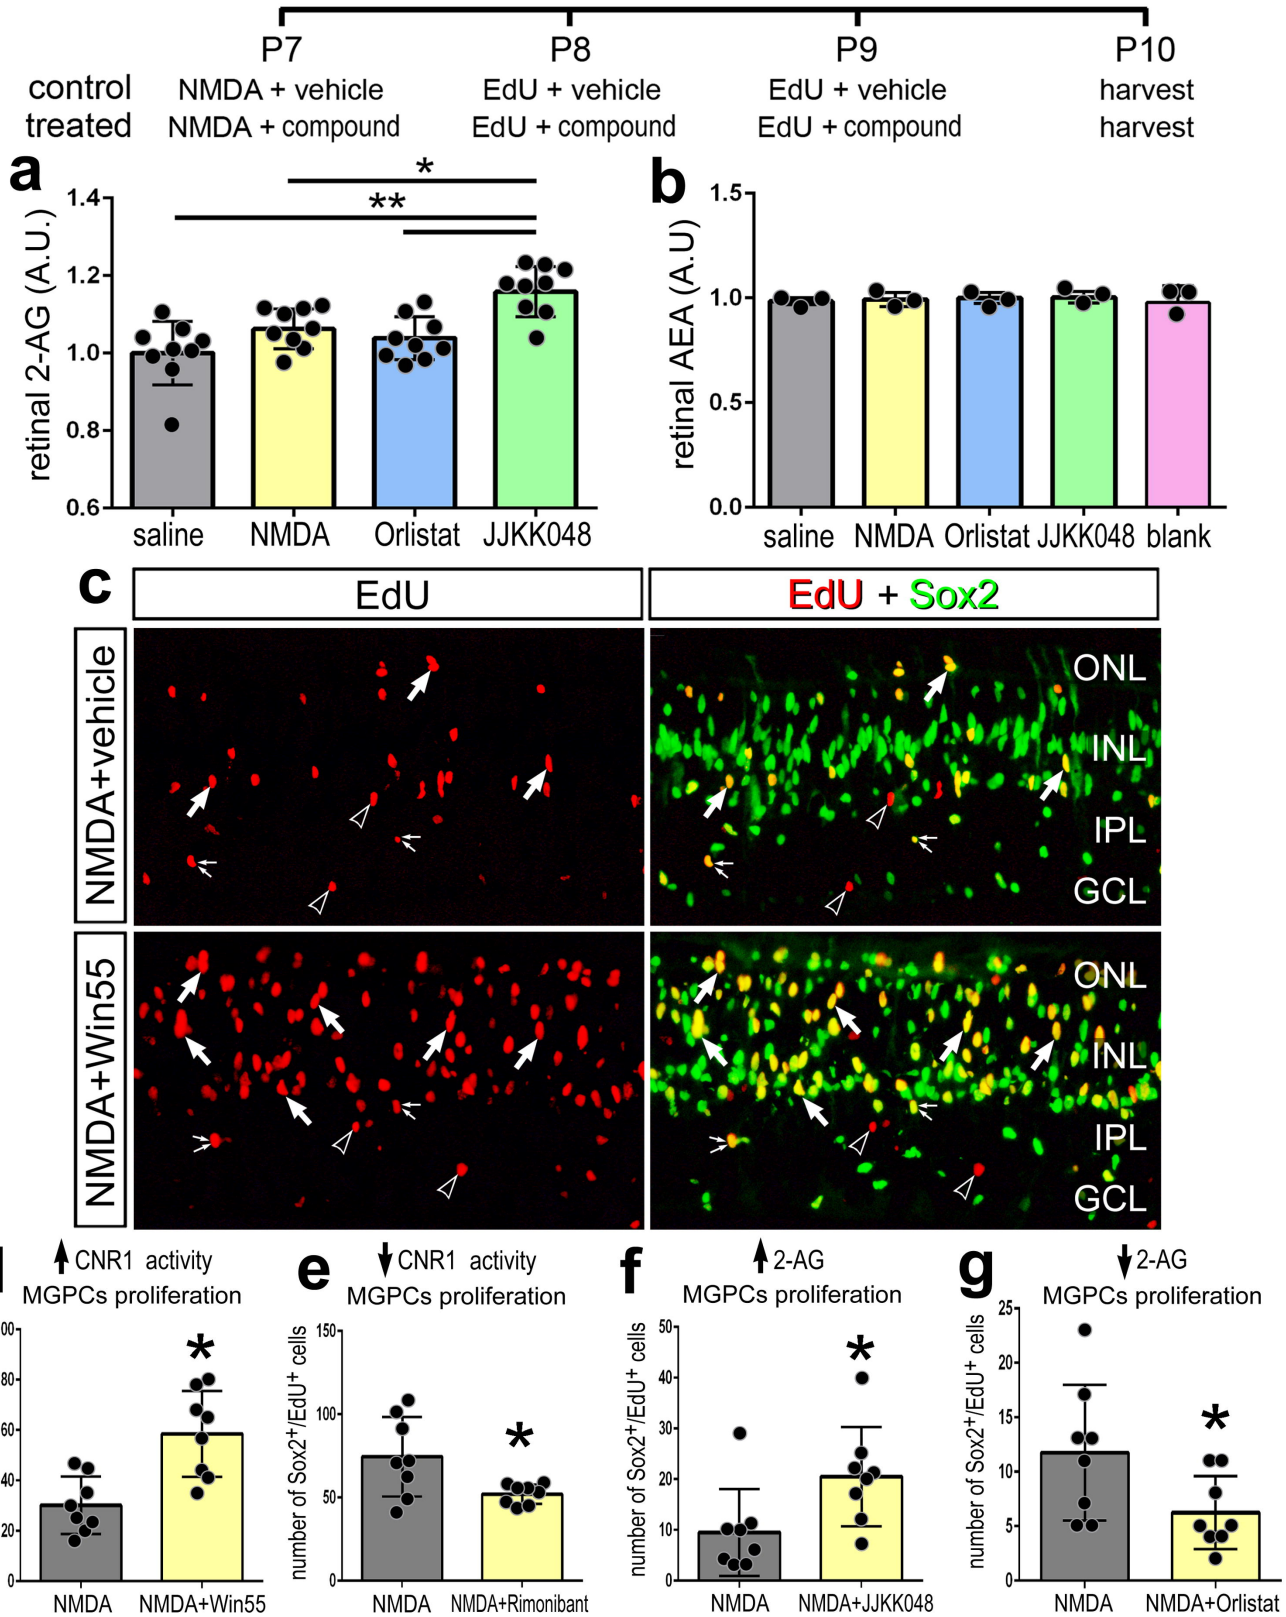

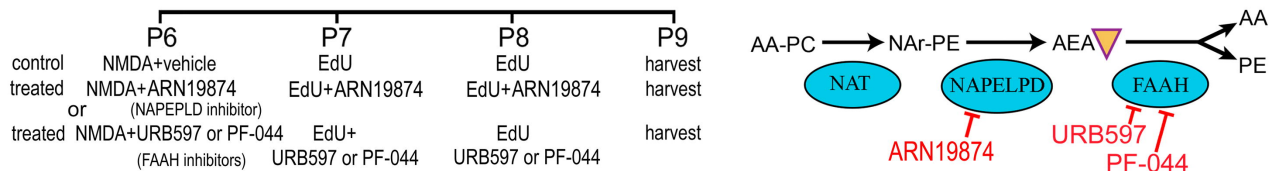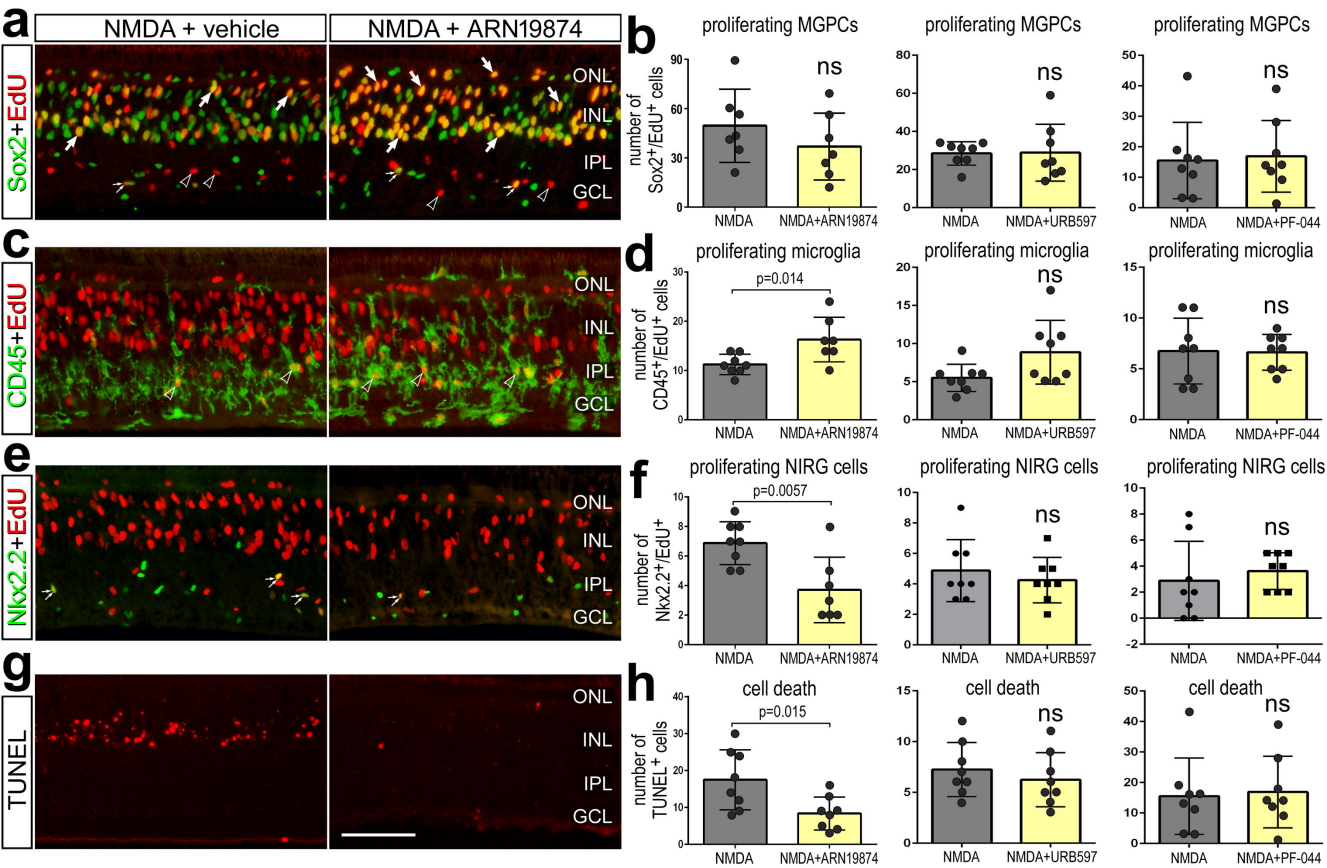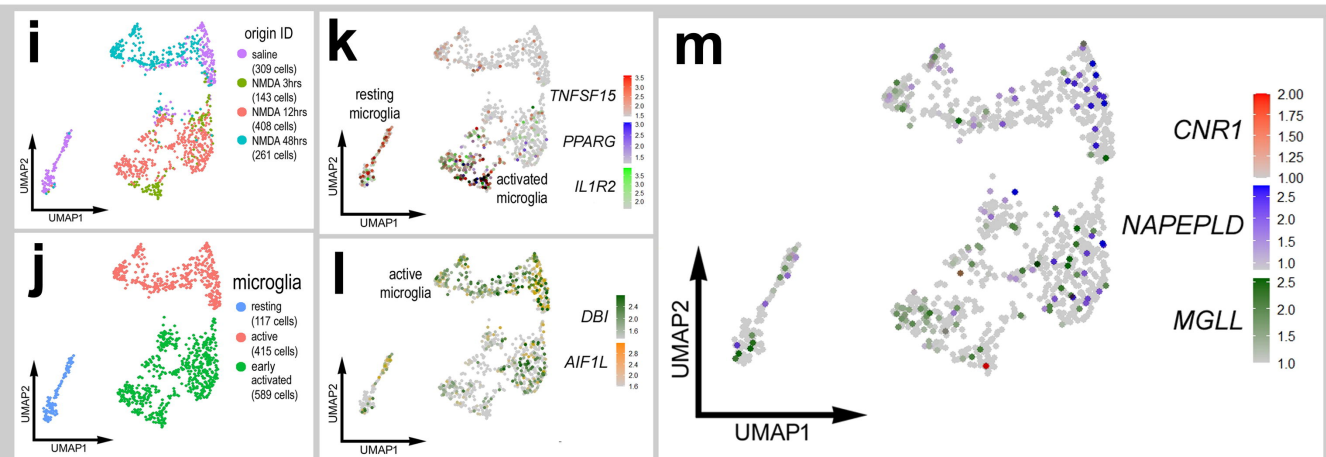

control treated

P7 NMDA + vehicle  
NMDA + compound

P8 EdU + vehicle  
EdU + compound

P9 EdU + vehicle  
EdU + compound

P10 harvest  
harvest

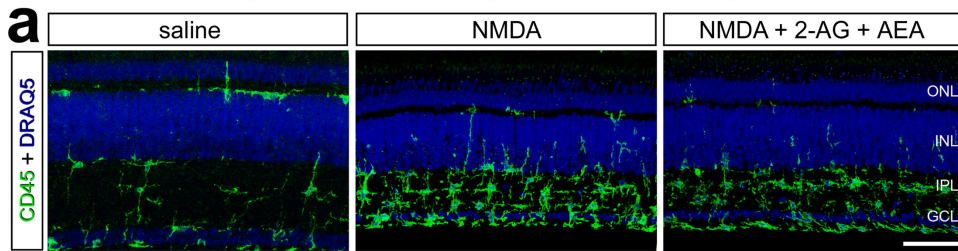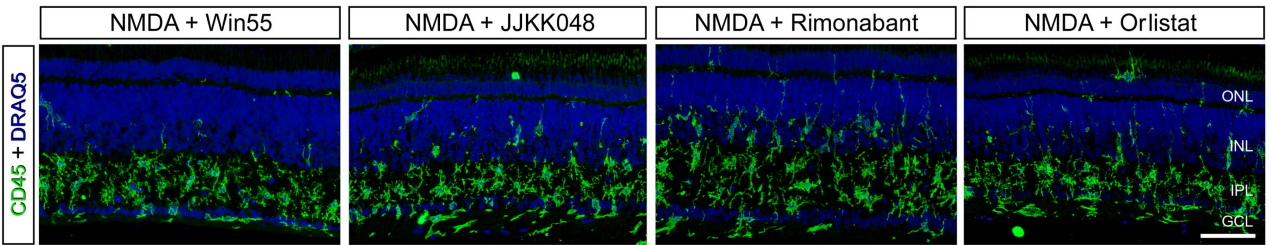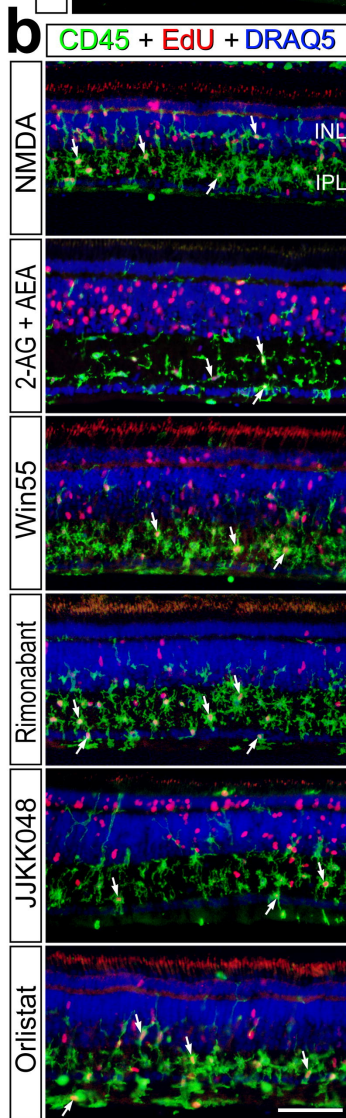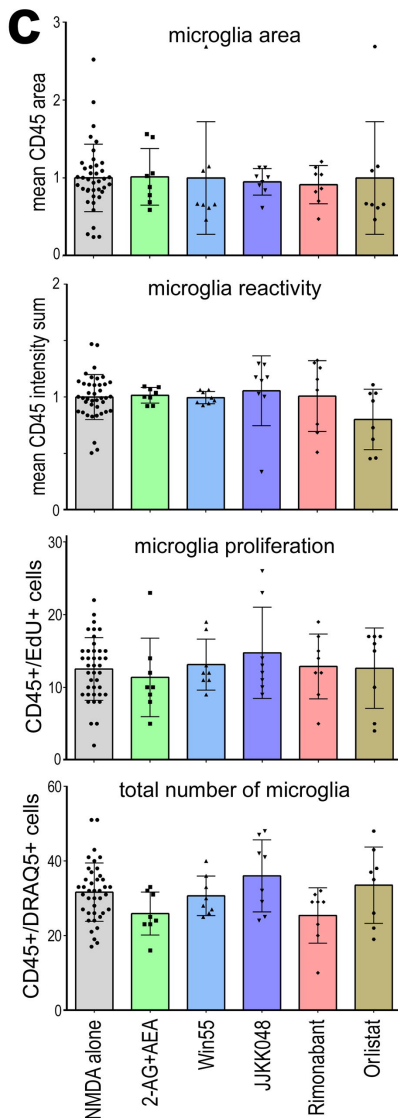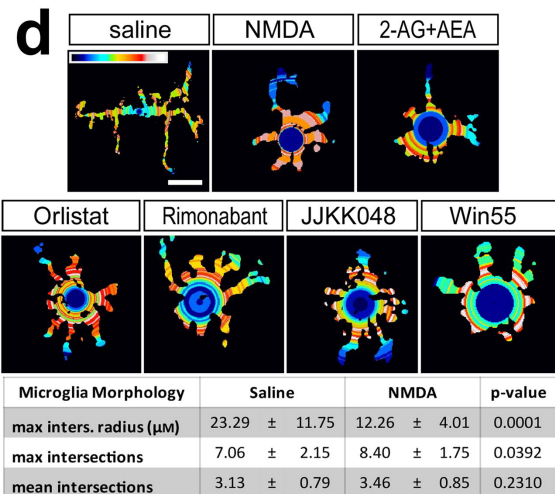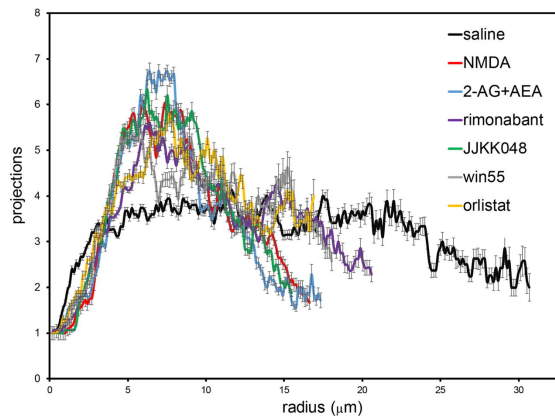

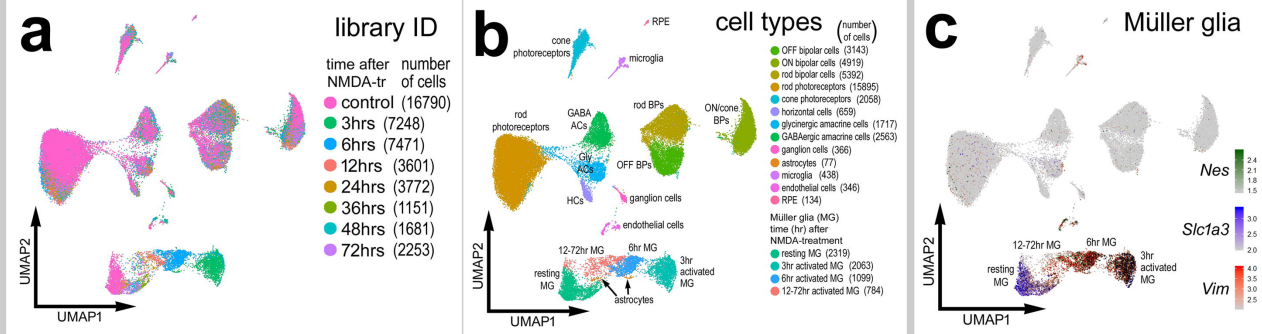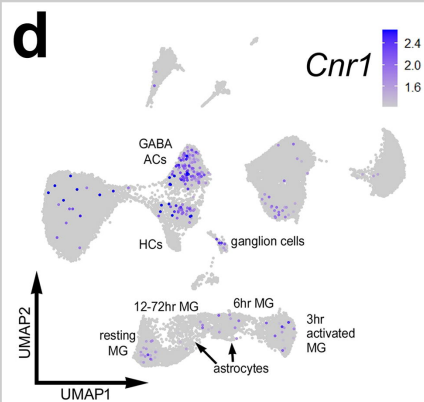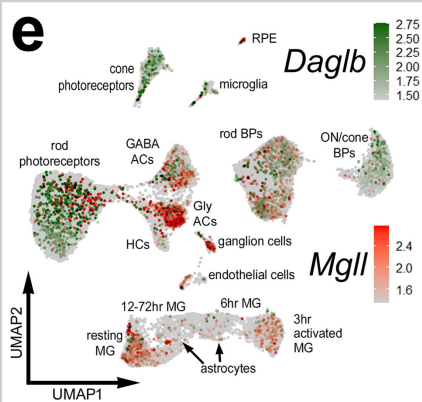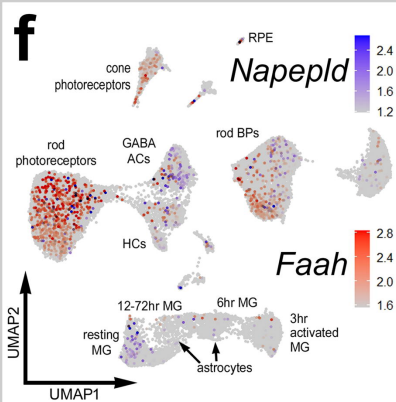

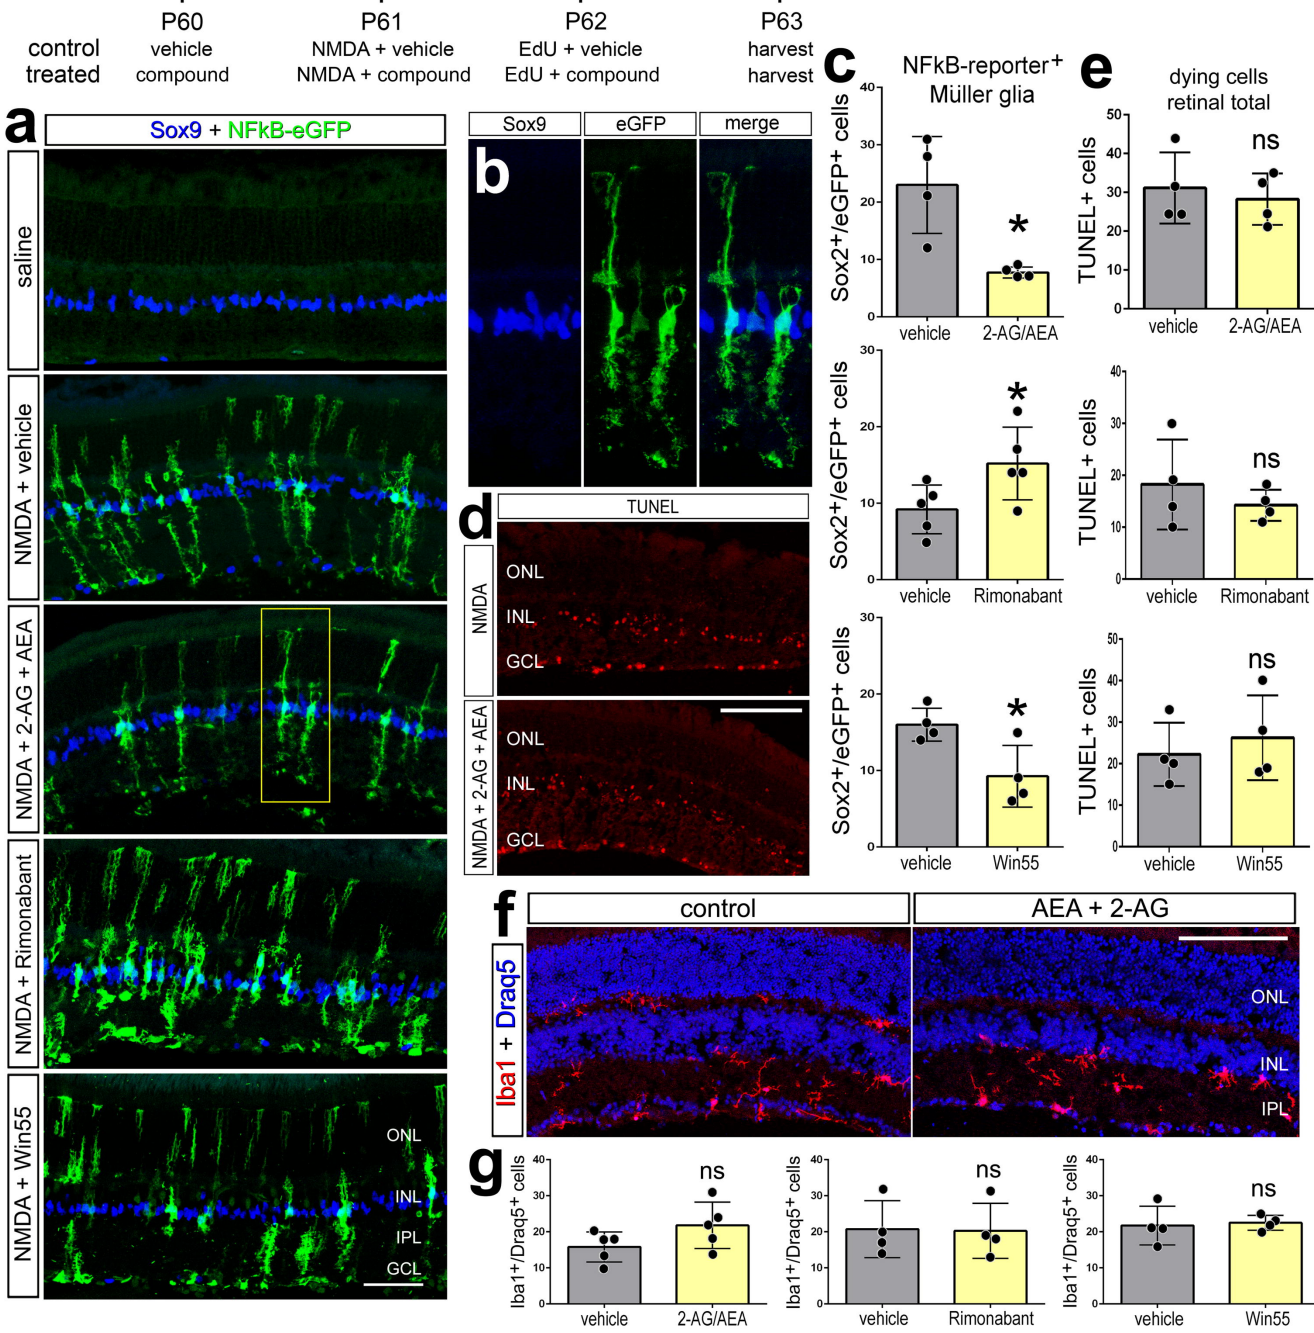

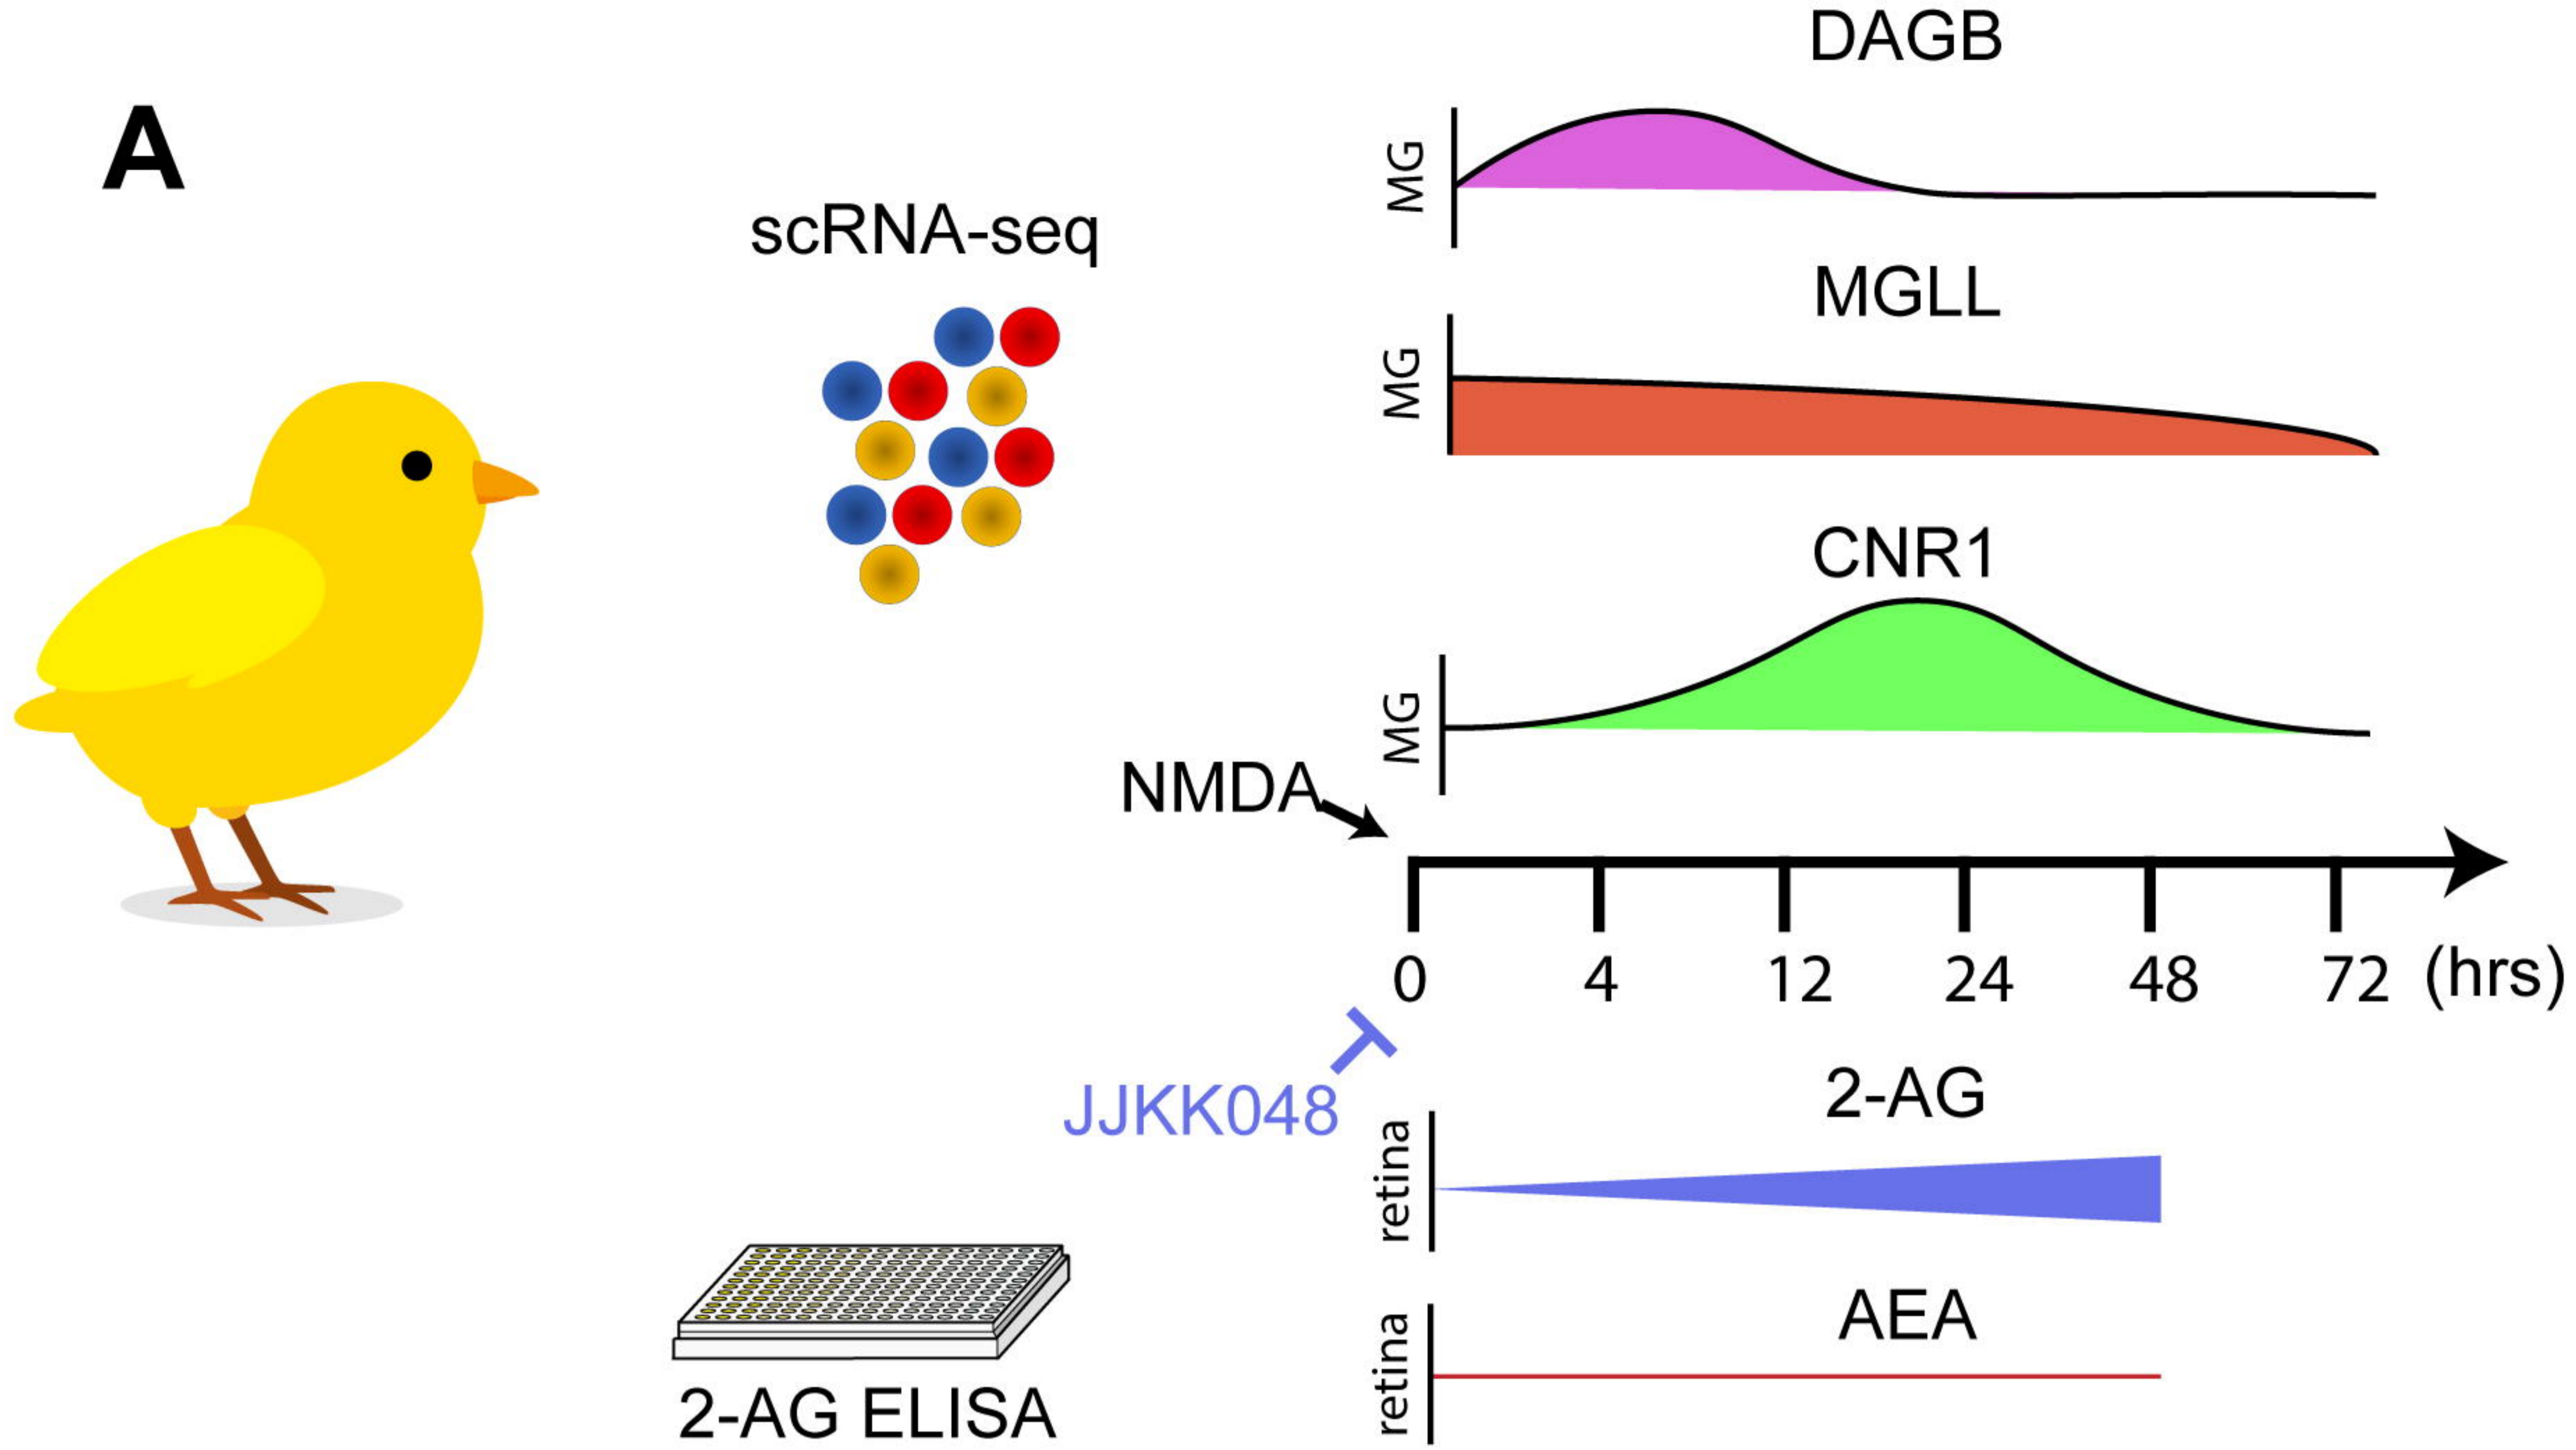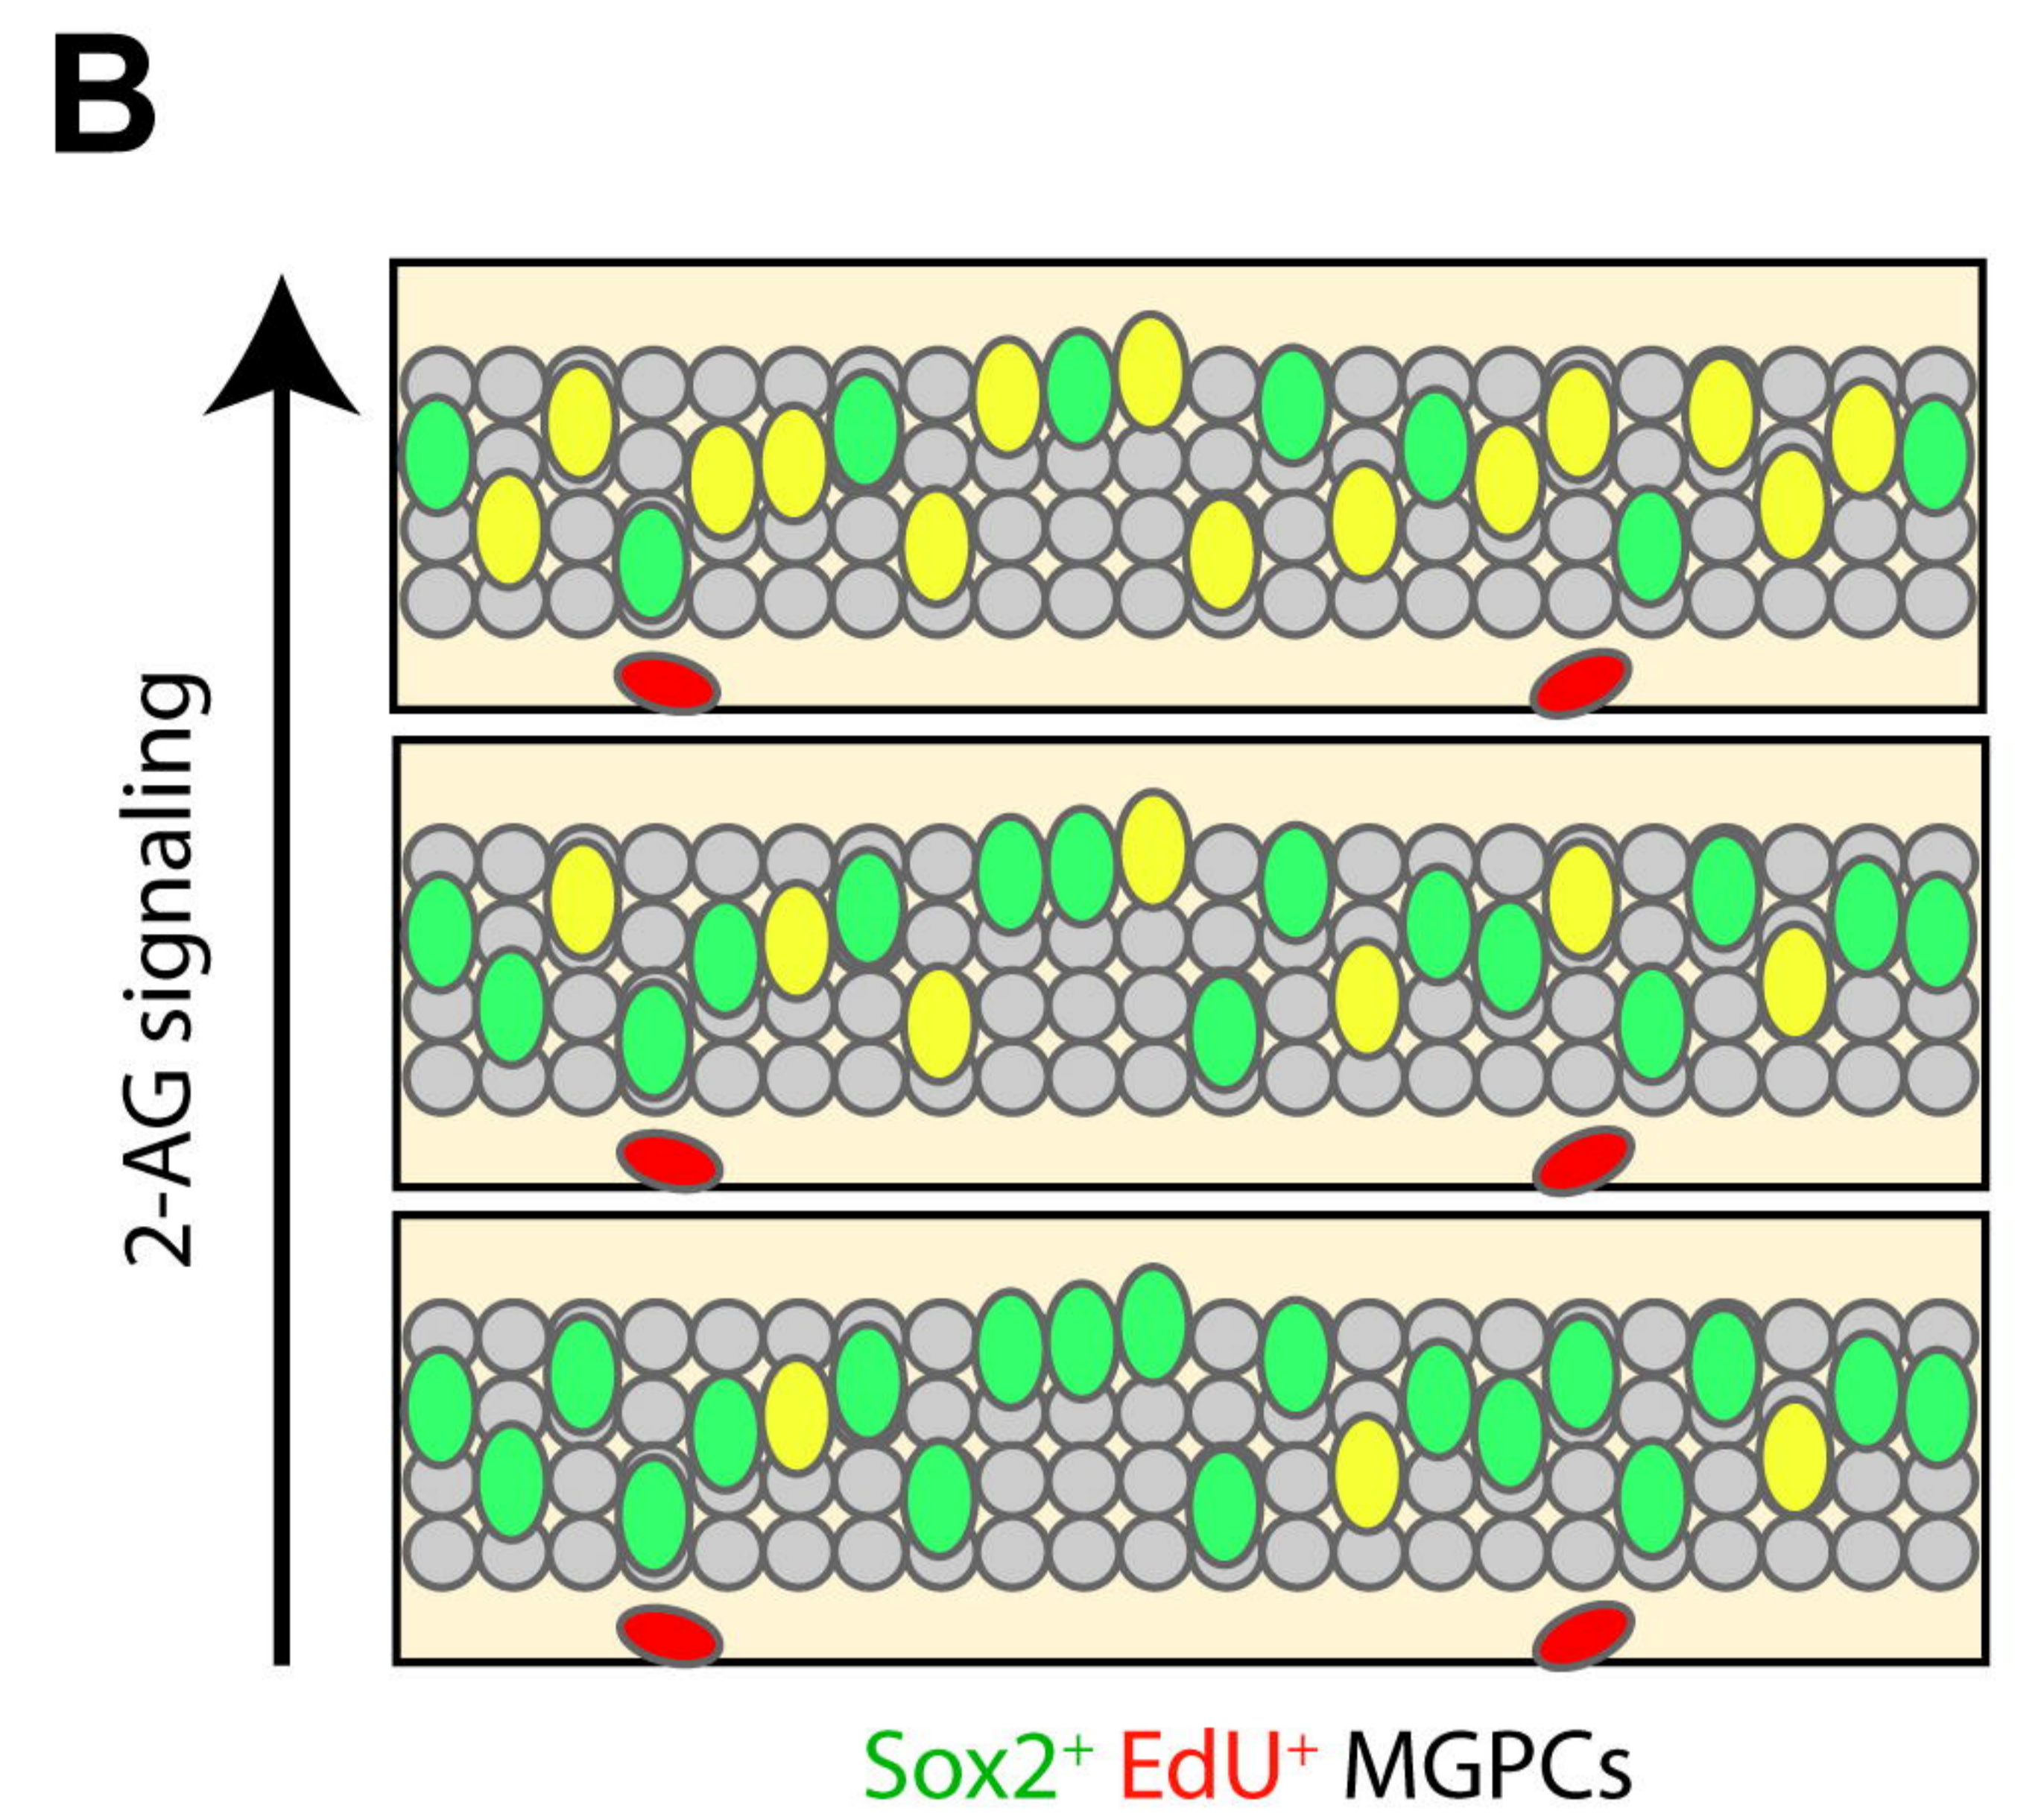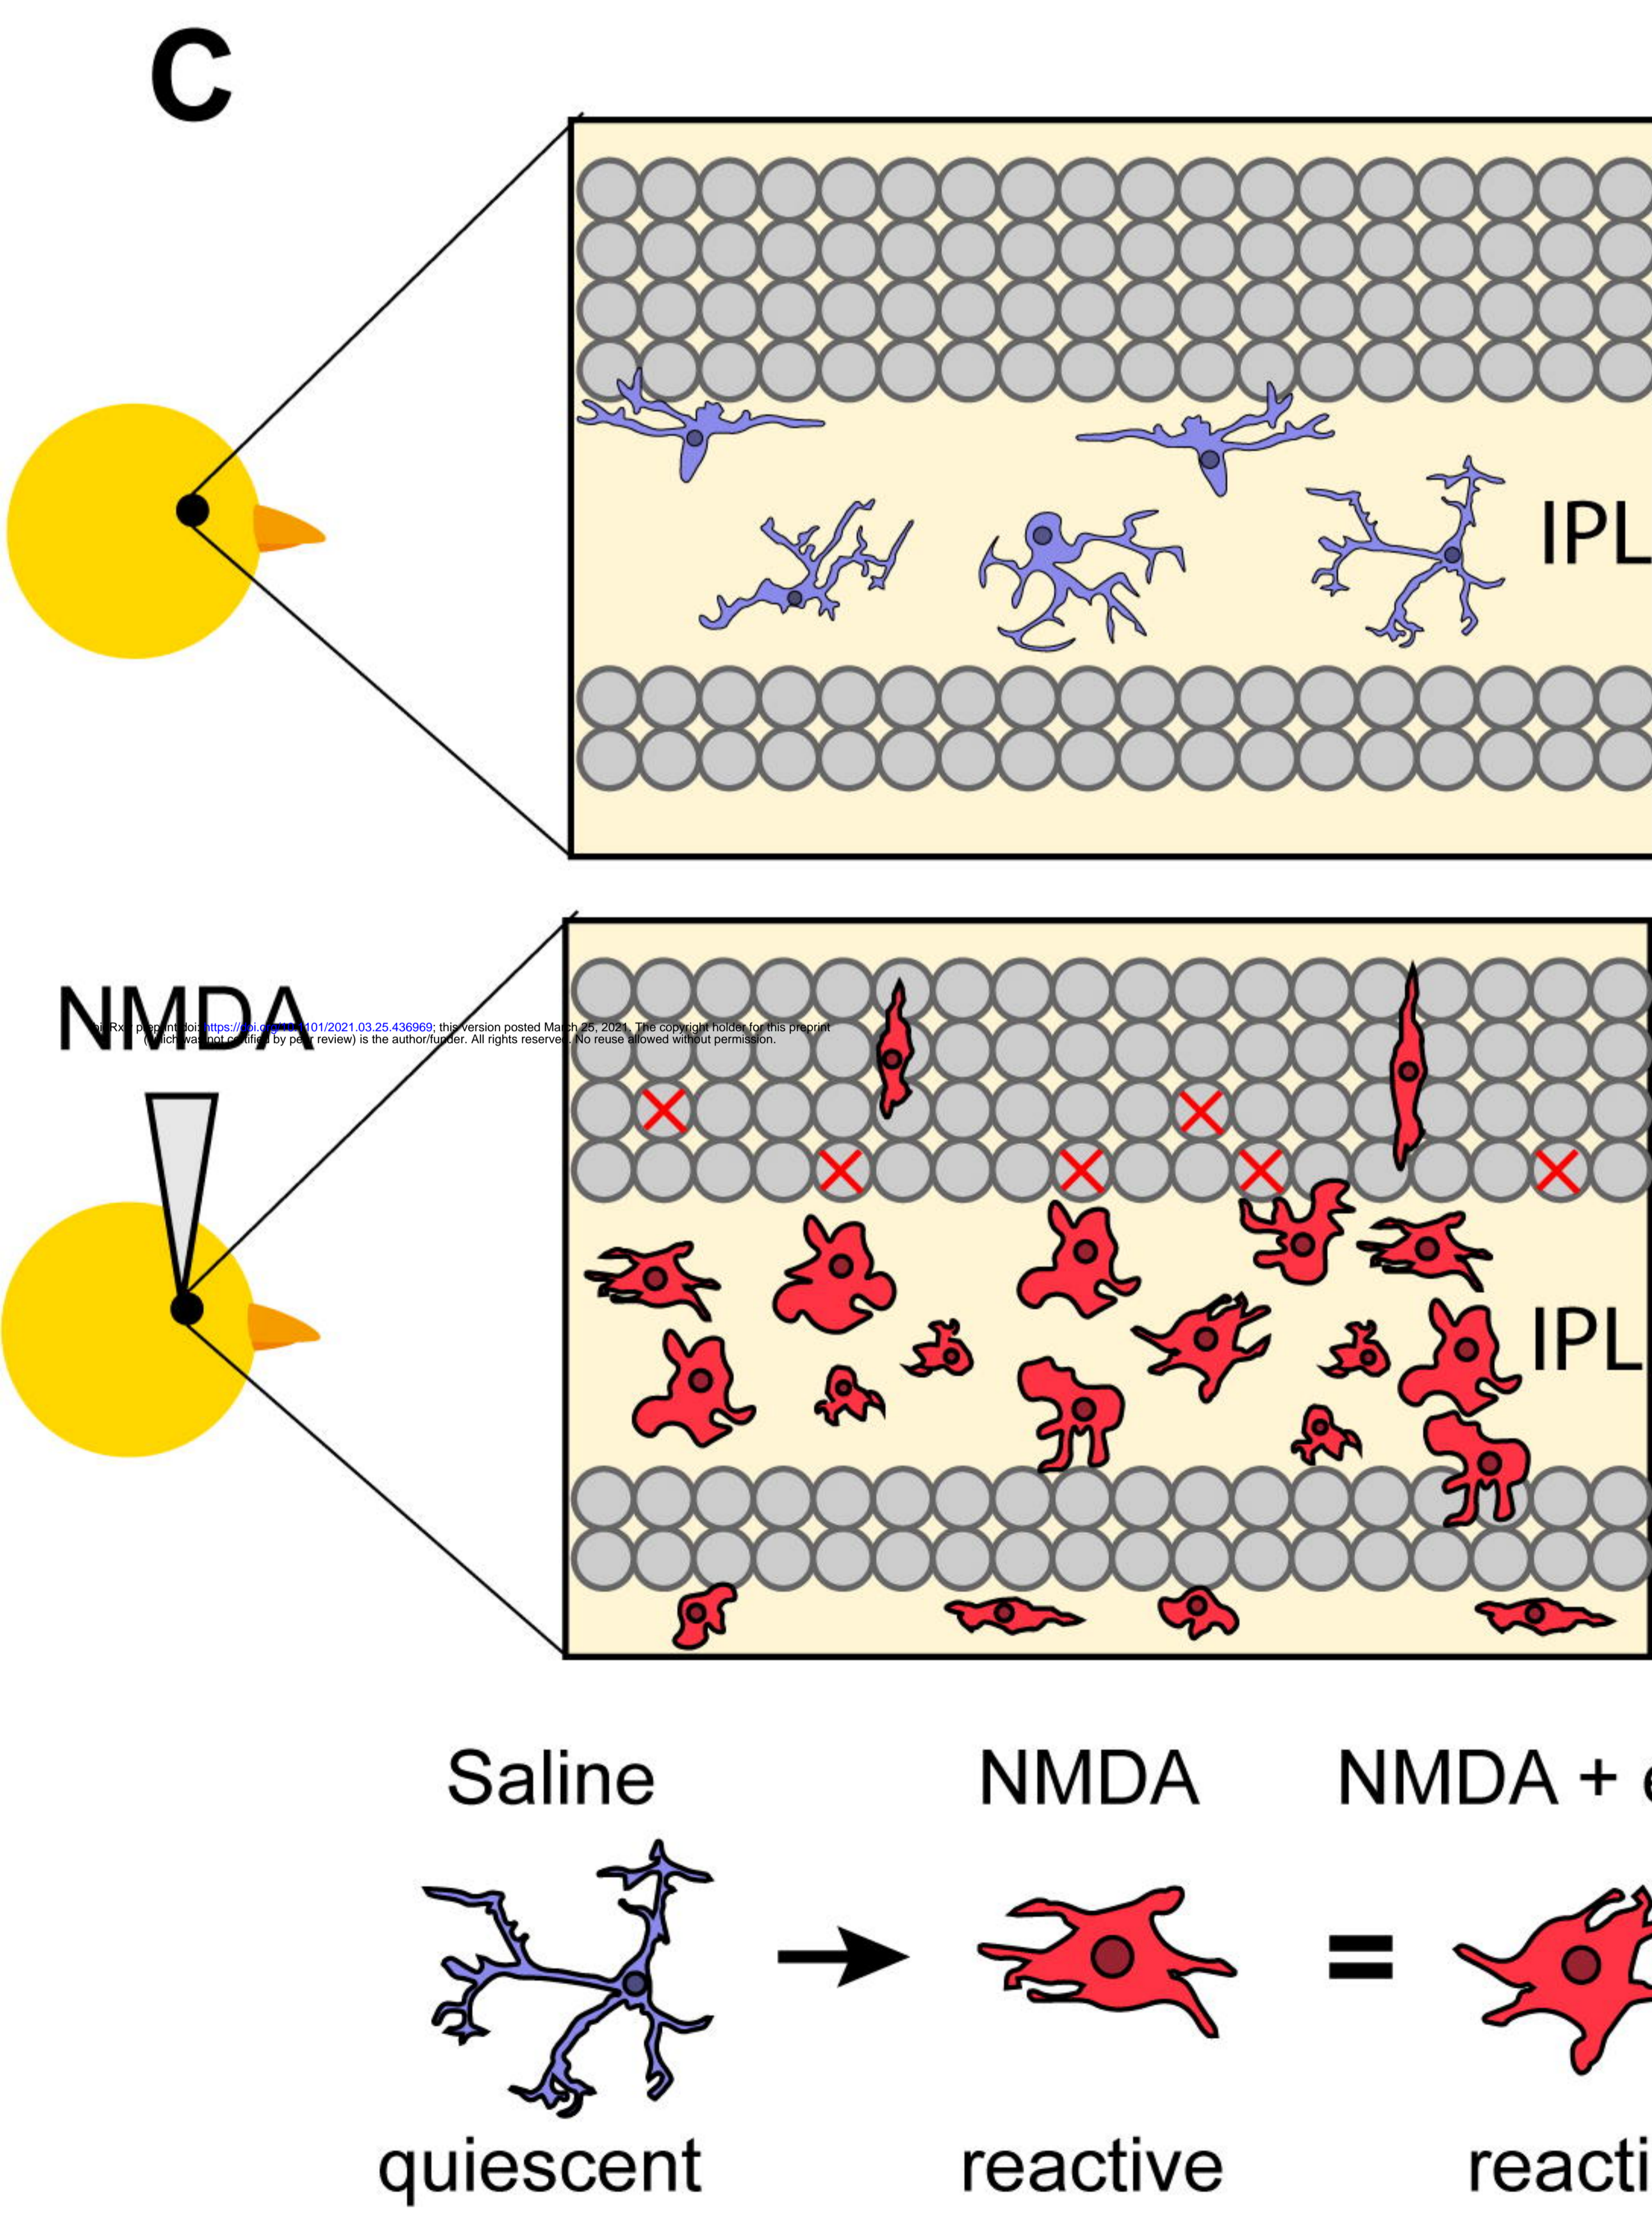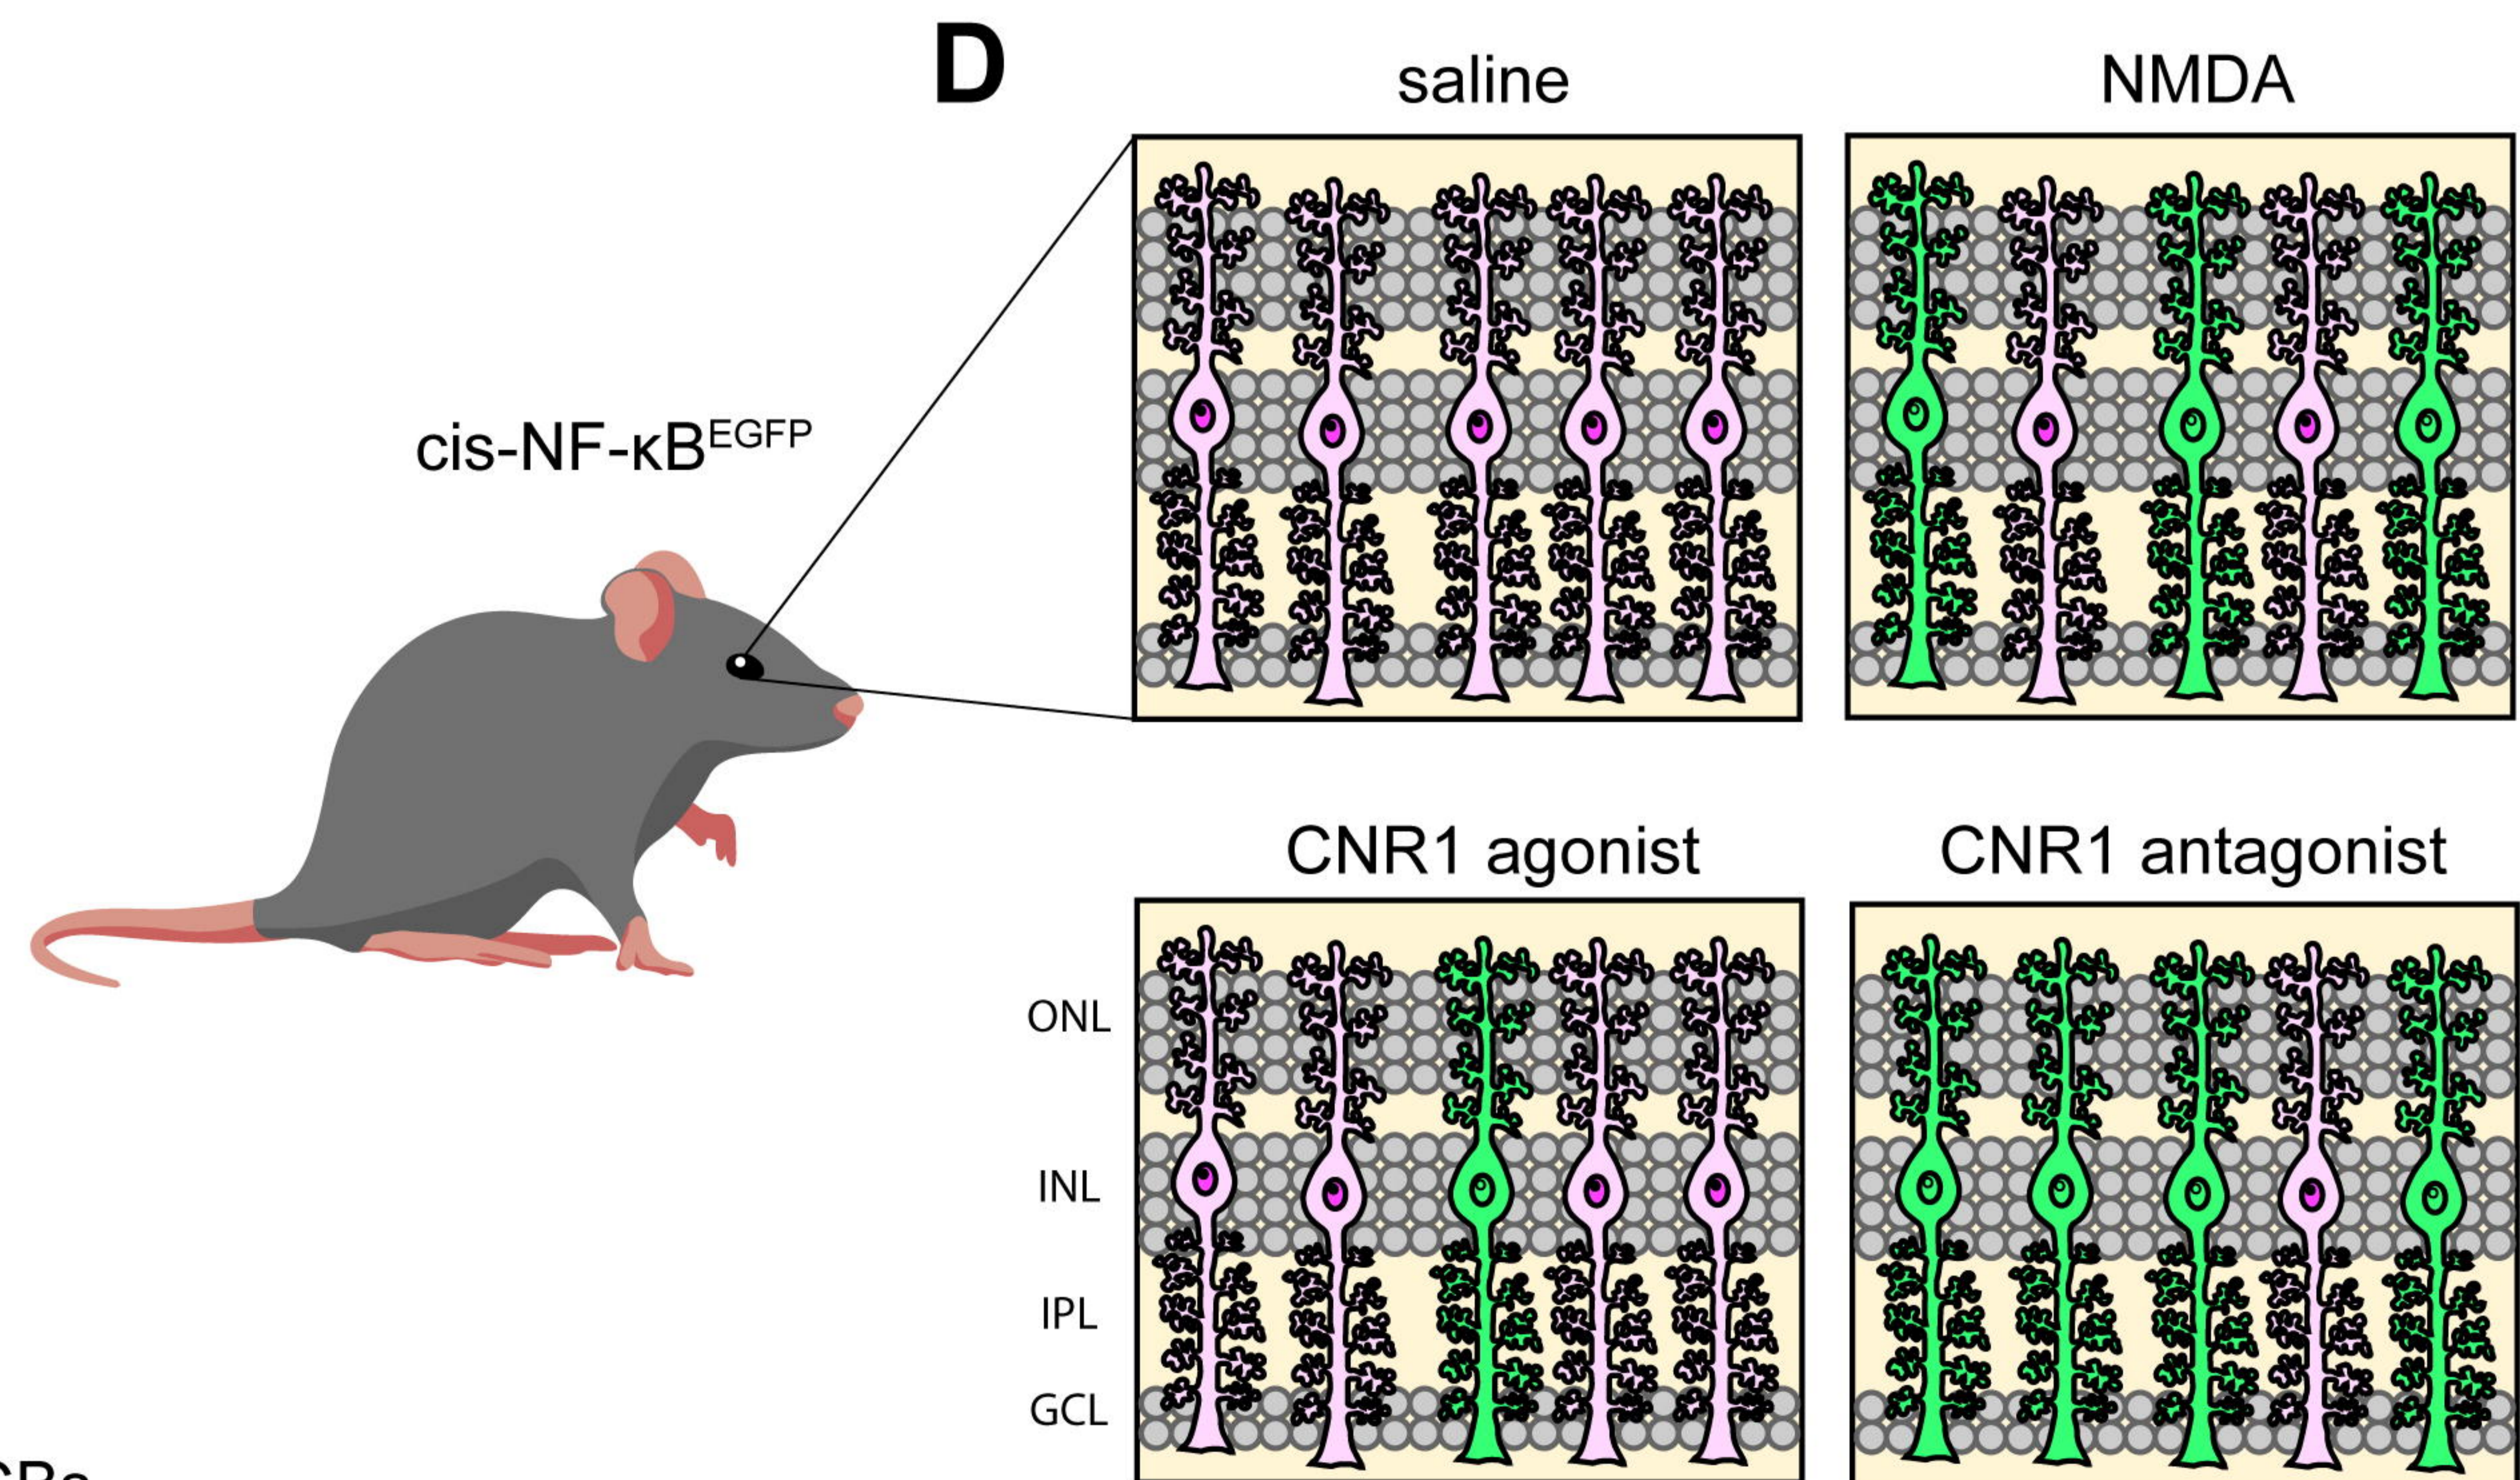

|                                      | vehicle          | enhance signal   |                  |                  |                  | dampen signal    |         | ANOVA |
|--------------------------------------|------------------|------------------|------------------|------------------|------------------|------------------|---------|-------|
| Microglia Morphology                 | NMDA             | 2AG + AEA        | JKKK-048         | Win55-212,2      | Rimonabant       | Orlistat         | p-value |       |
| max inters. radius ( $\mu\text{M}$ ) | 12.26 $\pm$ 4.01 | 11.90 $\pm$ 3.72 | 11.99 $\pm$ 3.51 | 12.65 $\pm$ 5.44 | 14.01 $\pm$ 5.83 | 12.27 $\pm$ 2.96 | 0.782   |       |
| mean intersections                   | 8.40 $\pm$ 1.75  | 7.93 $\pm$ 1.83  | 8.80 $\pm$ 2.54  | 7.40 $\pm$ 1.76  | 8.20 $\pm$ 1.85  | 9.13 $\pm$ 1.88  | 0.189   |       |
| max intersections                    | 3.46 $\pm$ 0.85  | 3.36 $\pm$ 0.61  | 3.58 $\pm$ 0.86  | 3.44 $\pm$ 0.81  | 3.63 $\pm$ 0.70  | 0.36 $\pm$ 0.68  | 0.921   |       |
